1 Dietary and other risk factors for cardiovascular disease  
2 analysed with Global Burden of Disease worldwide  
3 cohorts: lipid hypothesis versus fat-soluble vitamin  
4 hypothesis

5 David K Cundiff (0000-0002-3206-9665), independent researcher,<sup>1,3</sup> Chunyi Wu (0000-0002-  
6 2186-3433), Research Epidemiologist/Statistician,<sup>2,3</sup>

7 1 Long Beach, California, USA

8 2 Area Specialist Lead in Epidemiology and Statistics, Michigan Medicine, Ann Arbor,  
9 Michigan, USA

10 3 Volunteer collaborators with the Institute of Health Metrics and Evaluation, Seattle,  
11 Washington, USA

12 Correspondence to David K Cundiff [davidkcundiff@gmail.com](mailto:davidkcundiff@gmail.com)

13 Phone: 1-562-438-8805

14 Address: 333 Orizaba Ave. Long Beach, CA. 90814

15 Word count: abstract 311, Text: 4343

16 **Research in context**

17

18 **Evidence before this study**

19

20 Relating to dietary and other risk factors for early death from cardiovascular diseases worldwide,  
21 the EAT-Lancet Commission proposed the “Planetary Health Diet” to reduce non-communicable  
22 diseases and mitigate climate change. The Planetary Health Diet has been controversial and did  
23 not achieve the goal of leading a worldwide “Great Food Transformation” towards a more plant-  
24 based diet. The comparative risk assessment (CRA) systematic literature review-based  
25 methodology used in drafting the Planetary Health Diet has no significant competitors as  
26 published methodologies used to parse health effects of worldwide dietary and other risk factors.  
27 No consensus exists about an optimal range of diets for optimum human health, including  
28 cardiovascular disease prevention/treatment.

29 **Added value of this study** □

30 Cardiovascular disease deaths/100k/year in 15-69-year-old males and females (CVD) worldwide  
31 correlated with dietary risk factors had two patterns based on the amounts of kilocalories/day  
32 (Kcal/day) of animal foods and added fats. We differentiated the two patterns by defining a “fat-  
33 soluble vitamin variable” Kcal/day (FSVV=processed meat + red meat + fish + milk + poultry +  
34 eggs + (added saturated fatty acids (SFA)+polyunsaturated fatty acids (PUFA)+trans fatty acids  
35 (TFA)) \* 0.46 (all in Kcal/day). Worldwide, all nine risk factors comprising FSVV correlated  
36 negatively with CVD, but in high FSVV cohorts (FSVV $\geq$ 567.27 Kcal/day), all nine risk factors  
37 in the FSVV correlated positively with CVD.

38

39 **Implications of all the available evidence**

40 Animal foods and added fats afforded significant protection from CVD worldwide. The data  
41 suggested that the fat-soluble vitamins in animal foods and added fat facilitating gut absorption

42 may have been partially or entirely responsible for the worldwide protection from CVD.  
43 However, in high FSVV intake cohorts, SFA in food and in extracted added fats facilitating  
44 atherosclerosis may have partially or entirely accounted for the positive correlation of FSVV and  
45 CVD. The findings suggest that a yet not precisely defined moderate amount of animal food and  
46 added fat intake contributed to lower cardiovascular risk relative to very high or very low  
47 intakes.  
48

## 49 **Abstract**

50 **Background:** Debate about whether high intake of dietary saturated fatty acids (SFA) causes  
51 coronary heart disease (the lipid hypothesis) is ongoing.

52 **Methods:** Using worldwide Global Burden of Disease (GBD) data on cardiovascular disease  
53 deaths/100k/year, ages 15-69 years old in male and female cohorts (CVD) and dietary and other  
54 CVD risk factors, we formatted and population weighted data from 195 countries. The formatted  
55 rows of data (n=7846 cohorts) each represented about 1 million people, totaling about 7.8 billion  
56 people in 2020. We correlated CVD with dietary and other risk factors worldwide and in  
57 appropriate subsets. Outcome measures included CVD versus dietary and other risk factor  
58 correlations worldwide and in subsets.

59 **Findings:** After empirical data exploration, we defined a “fat-soluble vitamin variable” Kcal/day  
60 (FSVV) as, “FSVV=processed meat + red meat + fish + milk + poultry + eggs + (SFA +  
61 polyunsaturated fatty acids (PUFA) + trans fatty acids (TFA)) \* 0.46 (all in Kcal/day).” Low  
62 density lipoprotein cholesterol mmol/L correlated strongly positively with FSVV worldwide  
63 ( $r=0.780$ , 95% CI 0.771 to 0.788,  $p<0001$ , n=7846 cohorts), so we considered FSVV our marker  
64 variable to test both the lipid hypothesis and our fat-soluble vitamin hypothesis. LDL-C  
65 correlated negatively with CVD worldwide ( $r= -0.279$ , 95% CI -0.299 to -0.258,  $p<0.0001$  as did  
66 FSVV versus CVD ( $r= -0.329$ , 95% CI -0.349 to -0.309,  $p<0.0001$ ). However, FSVV correlated  
67 positively with CVD in the highest FSVV cohorts (mean male/female FSVV  $\geq 567.27$  Kcal/day:  
68  $r=0.523$ , 95% CI 0.476 to 0.567,  $p<0001$ , n=974 cohorts).

69 **Interpretation:** Since FSVV correlated positively with CVD only in high FSVV cohorts, the  
70 data supported the lipid hypothesis only in GBD cohorts with high FSVV intake. Since both  
71 FSVV and LDL-C correlated negatively with CVD worldwide, only the fat-soluble vitamin

72 hypothesis was supported worldwide. This GBD cohort data analysis methodology could be used  
73 to help develop food policy and education strategies for improving public health.

74 **Funding:** none

75

## 76 **Introduction**

77 The scientific validity of the Dietary Guidelines for Americans for 2015-2020, including  
78 guidelines based on the lipid hypothesis, was challenged by Journalist Nina Teicholz in the  
79 *BMJ*.<sup>1</sup> The Center for Science in the Public Interest called for the *BMJ* to retract the article. Peer  
80 reviewers the *BMJ* selected to adjudicate the far-reaching dispute concluded that, “Teicholz’s  
81 criticisms of the methods used by Dietary Guidelines for Americans Committee are within the  
82 realm of scientific debate.”<sup>2</sup> Currently, no methodology for relating cardiovascular disease  
83 events to food intake has been generally accepted as rigorous, replicable, and scientifically valid.

84  
85 This paper will use population weighted, formatted, worldwide global burden of disease (GBD)  
86 data from the Institute of Health Metrics and Evaluation (IHME) to assess the impact of diet,  
87 metabolic risk factors, tobacco use, air pollution, and other risk factors on cardiovascular disease  
88 deaths/100k/year in male and female cohorts 15-69-years-old (CVD).

89  
90 We were open to the possible support of the data for the lipid hypothesis but also for our newly  
91 defined, “fat-soluble vitamin hypothesis,” which an initial exploration of the GBD data  
92 prompted. We defined it as “insufficient dietary intake of fat-soluble vitamin containing  
93 animal foods and added fat for gut absorption increases cardiovascular disease risk.”  
94 We will elaborate in the results and the discussion.

95

96 .

97

## 98 **Methods**

99 As volunteer collaborators with the IHME, we acquired and utilised raw GBD worldwide  
100 ecological data (GBD: 195 countries and 365 subnational locations, n=1120 male and female  
101 cohorts). Data consisted of the rate of cardiovascular disease early deaths, metabolic risk factors,  
102 dietary risk factors and covariates, and other risk factors of male and female cohorts 15-49 years  
103 old and 50-69 years old from each year 1990-2017. GBD worldwide citations of over 12,000  
104 surveys constituting ecological data inputs for this analysis are available online from IHME.<sup>3</sup>  
105 The main characteristics of IHME GBD data sources, the protocol for the GBD study, and all  
106 risk factor values have been published by IHME GBD data researchers and discussed  
107 elsewhere.<sup>4-8</sup> These include detailed descriptions of categories of input data, potentially  
108 important biases, and the methodologies of analysis. We did not clean or pre-process any of the  
109 GBD data. GBD cohort risk factor and health outcome data from the IHME had no missing  
110 records.  
111  
112 Food risk factors came from surveys that IHME utilised as gram/day (g/d) consumed on average.  
113 GBD dietary covariate data originally came from Food and Agriculture Organization surveys of  
114 animal and plant food commodities available per capita in countries worldwide (potatoes, corn,  
115 rice, sweet potatoes, poultry, and eggs)—as opposed to consumed on average.<sup>9</sup>  
116  
117 Supplementary Table 1 lists the relevant GBD dietary and other risk factors, covariates, and  
118 other available variables with definitions of those risk factor exposures.<sup>7</sup> Once IHME staff time  
119 constraints due to COVID-19 data collection and modeling are over, the updated GBD 2020 data

120 with all the variables as the GBD 2017 data that we used for this analysis may be obtained by  
121 volunteer researchers collaborating with IHME.<sup>10</sup>

122

### 123 Study design and population

124 For cardiovascular disease early deaths and all risk factors, we averaged the values for ages 15-  
125 49 years old together with 50-69 years old for each male and female cohort for each year.

126 Finally, for each male and female cohort, data from all 28 years (1990-2017) of the means of the  
127 rate of CVD and risk factor exposures were averaged using the computer software program R.

128

129 To weigh the data according to population, internet searches (mostly Wikipedia) yielded the  
130 most recent population estimates for countries and subnational states, provinces, and regions.

131 The 1120 GBD cohorts available were population weighted by a software program in R,

132 resulting in an analysis dataset with 7846 population weighted cohorts representing about 7.8

133 billion people in 2020. Each male or female cohort in the population-weighted analysis dataset

134 represented approximately 1 million people (range: < 100,000 to 1.5 million). World population

135 data from the World Bank or the Organization for Economic Co-operation and

136 Development could not be used because they did not include all 195 countries or any subnational  
137 data.

138

139 Supplementary Table 2 details how omega-3 fatty acid g/d was converted to fish g/d using data

140 on the omega-3 fatty acid content of frequently eaten fish from the National Institutes of Health

141 Office of Dietary Supplements (USA).<sup>11</sup> As shown in Supplementary Table 3, we converted all

142 of the animal and plant food data, including alcohol and sugary beverage consumption, from g/d



143 to kilocalories/day (Kcal/day). For the g/d to Kcal/day conversions, we used the Nutritionix track  
144 app,<sup>12</sup> which tracks types and quantities of foods consumed. Saturated fatty acids (SFA: 0-1  
145 portion of the entire diet Kcal/day) was not available with GBD 2017 data, so GBD SFA risk  
146 factor data from GBD 2016 was used. Polyunsaturated fatty acid (PUFA) and trans fatty acid  
147 (TFA) GBD risk factor data from 2017 (0-1 portion of the entire diet Kcal/day) were also  
148 utilised, but monounsaturated fat data were not available. These fatty acid data expressed as 0-1  
149 portion of the entire diet were converted to Kcal/day by multiplying by the total Kcal/day  
150 available (a covariate from the Food and Agriculture Organization<sup>9</sup>) per capita for each cohort.

151

## 152 Outcome variable and covariates

153 CVD, the principal outcome variable of this analysis, was a combination variable consisting of  
154 the deaths/100k/year of male and female cohorts from (1) ischemic heart disease, (2) stroke, (3)  
155 hypertensive heart disease, (4) rheumatic heart disease, (5) non-rheumatic valvular disease, (6)  
156 subarachnoid haematoma, (7) myocarditis, (8) alcoholic cardiomyopathy, (9) endocarditis, aortic  
157 aneurysm, and (10) atrial fibrillation. Given the multiple dietary and other influences on the  
158 causation of CVD, we did not attempt to differentiate between dietary risk factors and covariates.

159

## 160 Statistical methods

161 To determine the strengths of the risk factor correlations with CVD of population weighted  
162 worldwide cohorts (n=7846 cohorts) or subgroups of cohorts (e.g., highest and lowest CVD  
163 cohorts, etc.), we utilised Pearson correlation coefficients:  $r$ , 95% confidence intervals (CIs), and  
164  $p$  values.

165

166 To identify confounding in the univariate correlations, we used partial correlations, holding  
167 constant the suspected confounder variables.

168

### 169 Sensitivity analyses

170 We performed subset analyses on the 1000 cohorts with the lowest and highest levels of CVD.

171

172 We used SAS and SAS OnDemand for Academics software 9.4 (SAS Institute, Cary, NC) for the  
173 data analysis.

174

## 175 **Results**

176 Table 1 shows the 44 dietary, metabolic, and other worldwide risk factors potentially  
177 contributing to CVD (n=7846 cohorts). See Supplementary Table 1 for definitions of the risk  
178 factor and covariate variables. In Table 1, low density lipoprotein cholesterol mmol/L (LDL-C)  
179 negatively correlated with CVD worldwide ( $r=-0.279$ , 95% CI -0.299 to -0.258,  $p<0001$ ),  
180 meaning the higher the LDL-C the lower the CVD. Figure 1 gives the worldwide plot of LDL-C  
181 versus CVD, showing widely scattered data points with a negative slope of the least square  
182 regression line.

183  
184 Table 1 shows that CVD negatively correlated with all the animal foods and all the fatty acids  
185 (processed meats, red meats, fish, milk, poultry, eggs, SFA, PUFA, and TFA). Based on these  
186 unexpected finding, we formulated our “fat-soluble vitamin hypothesis”—insufficient dietary  
187 intake of fat-soluble vitamin containing animal foods and added fat for gut  
188 absorption increases cardiovascular disease risk. To test this hypothesis, we summed the  
189 Kcal/day of animal foods and added fats to produce a fat-soluble vitamins variable (Kcal/day)  
190 ( $FSVV = \text{processed meats Kcal/day} + \text{red meats Kcal/day} + \text{fish Kcal/day} + \text{milk Kcal/day} +$   
191  $\text{poultry Kcal/day} + \text{eggs Kcal/day} + \text{added SFA Kcal/day} + \text{added PUFA Kcal/day} + \text{added TFA}$   
192  $\text{Kcal/day}$ ). In determining the portion of SFA, PUFA, and TFA added in addition to the fatty  
193 acids in the animal and plant foods, an adjustment factor (fatty acids \* 0.46), adapted from the  
194 website “Our World in Data,” differentiated the fatty acids in individual foods (54% of the total)  
195 from the added fatty acids in oils, butter, lard, etc. (46% of the total).<sup>13</sup> This adjustment  
196 prevented double counting fatty acids (Kcal/day) and allowed a more accurate determination of  
197 FSVV.

198  
199 FSVV (with abundant SFA in animal foods and added extracted fat) correlated strongly with  
200 LDL-C worldwide ( $r=0.780$ , 95% CI 0.771 to 0.788,  $p<0001$ ,  $n=7846$  cohorts). Consequently,  
201 we considered that FSVV could serve as our marker for the lipid hypothesis as well as the fat-  
202 soluble vitamin hypothesis.  
203  
204 Table 2 shows a subgroup of 500 pairs of male and female cohorts with the lowest CVD values,  
205 totaling 1000 total cohorts (an arbitrary number). Notably, the mean FSVV in this low CVD  
206 subset (FSVV=531.38 Kcal/day) was much higher than the mean FSVV worldwide  
207 (FSVV=285.36 Kcal/day, Table 1) or the highest CVD subset mean FSVV (FSVV=235.66  
208 Kcal/day,  $n=1000$  cohorts, Table 2).  
209  
210 To test the lipid hypothesis with FSVV as the marker variable, we calculated the median FSVV  
211 of the low CVD 1000 cohorts (median FSVV=567.27 Kcal/day) and formed a subset of the  
212 highest FSVV cohorts (FSVV $\geq$ 567.27 Kcal/day,  $n=974$  cohorts, Table 3). In Table 3, we see a  
213 much higher mean FSVV (FSVV $\geq$ 692.58 Kcal/day) than in Table 2 and a strong positive  
214 correlation of FSVV with CVD ( $r=0.523$ , 95% CI 0.476 to 0.567,  $p<0001$ ,  $n=974$  cohorts). In  
215 contrast, LDL-C and CVD were negatively correlated in this high FSVV subset ( $r=-0.254$ , 95%  
216 CI -0.194 to -0.312,  $p<0001$ ,  $n=974$  cohorts). Figure 2 graphs the contrast between worldwide  
217 FSVV negatively correlating with CVD versus FSVV positively correlating with CVD in the  
218 highest FSVV cohorts (FSVV $\geq$ 567.27 Kcal/day).  
219

220 Table 4 shows FSVV's component risk factors (processed meat, red meat, fish, milk, poultry,  
221 eggs, and added (SFA+PUFA+TFA)) for the 34 countries in Table 2 in descending order by  
222 CVD. Table 5 gives all the CVD risk factors for seven representative countries out of the 34  
223 countries in Table 4 ( $CVD \leq 293.97$ ,  $n=1000$  cohorts).

224

225 The average alcohol intake was 81.0 Kcal/day worldwide. Alcohol Kcal/day correlated  
226 negatively with CVD worldwide ( $r=-0.061$ , 95% CI -0.083 to -0.039,  $p<0001$ , Table 1).

227 However, in high FSVV cohorts ( $FSVV \geq 567.27$  Kcal/day), mean alcohol=155.02 Kcal/day),  
228 alcohol positively correlated with CVD ( $r=0.475$ , 95% CI 0.425 to 0.522,  $p<0001$ ,  $n=974$   
229 cohorts, Table 3).

230

231 Vitamin A deficiency incidence/100k in children  $\leq 5$  years old, the only fat-soluble vitamin in  
232 the GBD database, correlated positively with CVD worldwide ( $r=0.210$ , 95% CI 0.189 to 0.231,  
233  $p<0001$ , Table 1).

234

235 Dietary fiber was not significantly correlated with CVD worldwide ( $r=0.019$ , 95% CI -0.003 to  
236 0.041,  $p=0.09$ , Table 1). Once dietary fiber was adjusted for FSVV, alcohol, sugary beverages,  
237 and potatoes by partial correlation analysis; dietary fiber correlated negatively with CVD ( $r=-$   
238 0.052, 95% CI -0.074 to -0.030,  $p<0.0001$ ).

239

240 Physical activity positively correlated with CVD worldwide ( $r=0.160$ , 95% CI 0.139 to 0.182,  
241  $p<0.0001$ , Table 1). However, confounding factors existed:

242

- 243 1. countries with higher FSVV levels also had less physical activity (FSVV versus physical  
244 activity worldwide:  $r=-0.366$ , 95% CI: -0.385 to -0.347,  $p<0.0001$ ),  
245 2. females had less physical activity than males (mean physical activity males=5061  
246 METs/week, mean physical activity females=4356 METs/week), along with less CVD  
247 (mean CVD males=656.2, mean CVD females=428.6), and  
248 3. males smoked tobacco more than females (mean smoking (0-1) males=0.339 or 33.9%,  
249 mean smoking (0-1) females=0.070 or 7%), and males had more physical activity (as #2  
250 above).

251  
252 Once physical activity was adjusted for FSVV, smoking, and sex by partial correlation analysis,  
253 it correlated negatively with CVD ( $r=-0.127$ , 95% CI -0.149 to -0.104,  $p<0.0001$ ).

254  
255 In cohorts mostly in developed countries, with FSVV  $\geq 567.27$  Kcal/day, discontinuing breast  
256 feeding correlated positively with CVD ( $r=0.268$ , 95% CI 0.208 to 0.325,  $p<0.0001$ , Table 3).

257  
258 Secondhand smoking negatively correlated with CVD worldwide ( $r=-0.225$ , 95% CI -0.246 to -  
259 0.204,  $p<0.0001$ , Table 1). After adjusting secondhand smoking for (1) smoking, (2) sublingual  
260 tobacco use, (3) household smoke, (4) ambient air pollution, and (5) sex by partial correlation  
261 analysis; secondhand smoke correlated positively with CVD ( $r=0.048$ , 95% CI 0.025 to 0.070,  
262  $p<0.0001$ ).

263  
264 The metabolic risk factors, BMI, FPG, and LDL-C, all correlated negatively with CVD  
265 worldwide (BMI  $r=-0.240$ , 95% CI -0.261 to -0.219,  $p<0.0001$ , FPG  $r=-0.178$ , 95% CI -0.200 to

266 -0.157,  $p < 0.0001$ , and LDL-C  $r = -0.279$ , 95% CI -0.299 to -0.258,  $p < 0.0001$ , respectively, Table  
267 1). Once they were adjusted for FSVV, alcohol, sugary beverages, and potatoes by partial  
268 correlation analysis; they all correlated positively with CVD (BMI  $r = 0.028$ , 95% CI 0.006 to  
269 0.050,  $p = 0.0144$ , FPG  $r = 0.076$ , 95% CI 0.054 to 0.098,  $p < 0.0001$ , LDL-C  $r = 0.170$ , 95% CI  
270 0.148 to 0.191,  $p < 0.0001$ , respectively). In the cohorts with  $FSVV \geq 567.27$  Kcal/day, BMI and  
271 FPG positively correlated with CVD (BMI  $r = 0.484$ , 95% CI 0.434 to 0.530,  $p < 0.0001$  and FPG  
272  $r = 0.091$ , 95% CI 0.028 to 0.153,  $p = 0.0046$ , respectively).

273

## 274 **Discussion**

275 Since this GBD data-based worldwide risk factor—health outcome analysis methodology has no  
276 precedent, there is no medical literature of previous such studies. The best comparator for this  
277 CVD versus risk factor analysis with IHME GBD data would be the comparative risk assessment  
278 (CRA) systematic literature review-based methodology used in drafting the “Planetary Health  
279 Diet.” Proposed by the EAT-Lancet Commission, the Planetary Health Diet was meant to spark a  
280 global transformation in human diets to improve health and mitigate climate change. The EAT-  
281 Lancet Commission authors said, “Transformation to healthy diets by 2050 will require  
282 substantial dietary shifts, including a greater than 50% reduction in global consumption of  
283 unhealthy foods such as red meat and sugar, and a greater than 100% increase in the  
284 consumption of healthy foods such as nuts, fruits, vegetables and legumes.”<sup>14</sup> Reducing diet-  
285 caused non-communicable diseases (e.g., obesity, type 2 diabetes, CVD, cancers, etc.) was a  
286 major goal. WHO data show that about 44% of worldwide non-communicable disease deaths  
287 were CVD related,<sup>15</sup> so these CVD analysis findings from GBD data can be fairly contrasted  
288 with the Planetary Health Diet proposal from CRA systematic literature review and expert  
289 opinion methodology.

290  
291 When introduced by the EAT-Lancet Commission, the Planetary Health Diet sparked  
292 controversy. Dr. Francisco Zagtutt and colleagues disputed the rigor of the analytics, “A truly  
293 effective global solution to the problem of human nutrition and environmental impact must be  
294 replicable, transparent, and supported with correct quantification of its impact. Unfortunately, the  
295 report did not meet these criteria.”<sup>16</sup> The World Health Organization (WHO) withdrew



296 sponsorship over the exclusivity of one dietary approach for the entire planet and the negative  
297 impact of reducing cattle and pig ranching in developing countries.<sup>17</sup>

298  
299 The methodologies and findings of this GBD data-based analysis of diet and other risk factors  
300 related to global CVD were markedly different than those of the EAT-Lancet Commission. Some  
301 of the consequential differences were as follows:

- 302
- 303 1. The Planetary Health Diet recommendations were based on systematic literature reviews  
304 primarily from researchers and participants in developed countries, largely missing at  
305 least 70% of the world's population. This IHME GBD data-based population weighted  
306 analysis proportionally included people in developing countries.
  - 307 2. To Dr. Zagmutt's point about the lack of rigor of the Planetary Health Diet analytics, this  
308 IHME GBD data analysis used a single population weighted analysis dataset, spanning  
309 28 years, making it replicable (with 2020 GBD data), transparent, and supported with  
310 reasonable quantification of the impact of global human nutrition on CVD.
  - 311 3. The overall amounts of animal foods (Kcal/day) recommended by the Planetary Health  
312 Diet (mean animal foods: 304 Kcal/day)<sup>18</sup> do not differ substantially from the overall  
313 animal foods (Kcal/day) in the GBD lowest CVD cohorts (338 Kcal/day, n=1000 cohorts,  
314 CVD < 292.97 deaths/year) in this analysis (Table 2). However, the Planetary Health Diet  
315 recommended 40 Kcal/day of fish<sup>18</sup> while the GBD data show that the world fish  
316 consumption from 1990-2017 averaged 10.0 Kcal/day (Table 1). Levels of overfishing  
317 are unsustainable now, so quadrupling fish consumption worldwide is impossible.  
318 Likewise, the Planetary Health Diet recommended average milk consumption to be 153

319 Kcal/day<sup>18</sup> while the GBD data show the world average milk consumption per person  
320 from 1990-2017 of 25.0 Kcal/day (Table 1). Increasing the world's dairy cows six-fold,  
321 most of whom would eventually be slaughtered for meat, would seem to contradict major  
322 goals of the EAT-Lancet Commission—reducing methane emissions from cows and  
323 reducing red meat consumption. Instead, increasing all livestock production in  
324 developing countries would be projected to improve CVD outcomes (Table 1) as would  
325 decreasing cattle, pig, and poultry raising, but not fish or eggs, in high FSVV cohorts  
326 (Table 3).

327 4. Whereas the Planetary Health Diet has a single set of recommended ranges of quantities  
328 of plant and animal foods for all humanity, the GBD data-based analysis methodology  
329 can apply to people in developing countries as well as developed countries.

330  
331 Fat-soluble vitamins include vitamins A, D, E, and K (K1=phylloquinones and K2=  
332 menaquinones). Vitamin K2 (menaquinones from animal foods and fermented plant products)  
333 inhibits arterial calcification, a major factor in the pathogenesis of atherosclerosis and  
334 cardiovascular disease.<sup>19</sup> Vitamin A and its beta-carotene precursor are important in preventing  
335 congenital heart disease.<sup>20,21</sup> Vitamin E protects the vasculature against oxidative stress,  
336 including lipid peroxidation and the production of atherogenic forms of LDL-C—a part of the  
337 pathogenesis of cardiovascular disease.<sup>22</sup> Regarding vitamin D, a meta-analysis of  
338 prospective studies showed an inverse correlation between cardiovascular disease  
339 and circulating 25(OH)-vitamin D ranging from 20 to 60 nmol/L.<sup>23</sup>

340

341 The four fat-soluble vitamins come primarily from animal foods. Vitamin K2 levels  
342 are high in aged cheeses, other fermented dairy products,<sup>24</sup> organ meats (e.g., bovine  
343 and pork liver), chicken, and egg yolks.<sup>25</sup> The Japanese had the world's lowest CVD from  
344 1990-2017 (mean CVD=169.2 deaths/100k/year). Paradoxically, crucial CVD risk factors were  
345 high in the Japanese (e.g., smoking: mean male/female smoking=26.8%, salt intake (mean  
346 sodium= 6.01 g/d, systolic blood pressure (mean SBP= 137.6 mm/Hg, Table 5). Relative to  
347 fermented cheeses, the content of vitamin K2 in fish was low to negligible (Japanese fish  
348 consumption mean=260.5 Kcal/day, Table 4).<sup>25</sup> Instead, Japanese consumed high quantities of  
349 vitamin K2 in the form of fermented soy products like natto and miso.<sup>26,27</sup> People that also  
350 consumed high amounts of fermented legumes were the Taiwanese (soybean Douchi, soybean  
351 Meitauza, and soybean curd<sup>28</sup>), South Koreans (Cheonggukjang, a fermented soybean  
352 stew<sup>28</sup>), and Thais (soybean Thua nao<sup>29</sup>). The Taiwanese, South Koreans, and Thais were  
353 also listed among the 34 low CVD countries (Table 4).

354  
355 In high FSVV cohorts, ( $FSVV \geq 567.27$  Kcal/day), why LDL-C correlated negatively with FSVV  
356 ( $r=-0.254$  95% CI -0.312 to -0.194,  $p<0.0001$ ,  $n=974$  cohorts) is not clear. However, multiple  
357 studies have documented that LDL-C may be influenced by genetic, racial, or ethnic differences  
358 that do not necessarily correspond with risk of CVD.<sup>30,31</sup> Additionally, LDL-C lowering  
359 medications in wide use especially in high FSVV intake developed countries may also confound  
360 the relationship of LDL-C with both LSVV and CVD risk in this subset cohort analysis.

361  
362 Since there are high FSVV and low FSVV intake individual people widely distributed  
363 worldwide, prospective observational studies of individuals in high FSVV areas, rather than

364 GBD cohort studies like this one, could better demonstrate positive correlations between LDL-C  
365 (or total cholesterol) and CVD. This may explain why the Seven Countries Study<sup>32</sup> of Ancel  
366 Keys and the Framingham Heart Study,<sup>33</sup> both in high FSVV regions, supported the lipid  
367 hypothesis. However, the Prospective Urban Rural Epidemiology (PURE) Study, with individual  
368 data on 135,335 patients from three high-income, 11 middle-income, and four low-  
369 income countries was clearly at variance with the lipid hypothesis.<sup>34</sup> The PURE Study found  
370 that higher saturated fat intake was associated with lower risk of stroke (quintile 5 vs quintile 1,  
371 HR 0.79, (95% CI 0.64 to 0.98),  $p_{\text{trend}}=0.0498$ ).

372  
373 Defining the optimal FSVV range that will reduce CVD risk while not increasing other diseases  
374 (e.g., cancers and obesity) will require more research. Supplements of fat-soluble vitamins to  
375 reduce the animal food and added fat intake required to minimise CVD should be studied,  
376 especially in developing countries with less access to animal foods.

377  
378 Given the negative correlations of CVD with both fish and eggs in both tables 1 and 3, the  
379 reduction of FSVV in high FSVV countries might best come from meat, poultry, and added fats.  
380 Although milk (including other dairy products) correlated positively with CVD in Table 3  
381 ( $r=0.185$ , 95% CI 0.123 to 0.245,  $p<0001$ ), this probably related to Japan and Peru having the  
382 lowest and fifth lowest CVD (Japan: mean CVD=169.2, mean milk=29.0 Kcal/day, Peru: mean  
383 CVD=197.7, mean milk=15.3 Kcal/day). Without Japan and Peru in the analysis ( $n=834$   
384 cohorts), milk correlated negatively with CVD ( $r=-0.071$ , 95% CI -0.138 to -0.030,  $p=0.0405$ ).  
385 Of the 34 low CVD countries in Table 4, 20 had high milk intakes (milk Kcal/day range: 68.8  
386 Kcal/day-124.1Kcal/day versus mean milk worldwide=25.0 Kcal/day, Table 1) and these high

387 milk intake cohorts all had relatively high per capita intakes of cheese.<sup>35,36</sup> Fermented, full-fat  
388 dairy products have high levels of fat-soluble vitamin K<sub>2</sub>,<sup>24,25</sup> which have been found to be  
389 important in preventing calcification of arteries and atherosclerosis.<sup>37</sup>  
390  
391 Potatoes Kcal/day available positively correlated with CVD both worldwide ( $r=0.050$ , 95% CI  
392  $0.028$  to  $0.073$ ,  $p<0.0001$ , Table 1) and in cohorts with  $FSVV \geq 567.27$  Kcal/day ( $r=0.109$ , 95%  
393 CI  $0.046$  to  $0.170$ ,  $p<0.0001$ , Table 3). Notably, half, or more of the potatoes consumed  
394 worldwide are in the form of highly processed food products.<sup>38</sup> Recent large prospective  
395 observational studies have found higher consumption of ultra-processed foods associated with an  
396 increased risk of cardiovascular disease incidence and CVD mortality.<sup>39,40</sup> Data from 79 high-  
397 and middle-income countries showed that ultra-processed products dominate the food supplies of  
398 high-income countries and that their consumption is now rapidly increasing in middle-income  
399 countries.<sup>41</sup>  
400  
401 Dietary sodium negatively correlated with CVD worldwide ( $r=-0.213$ , 95% CI  $-0.234$  to  $-0.192$ ,  
402  $p<0.0001$ , Table 1) and was not significantly correlated with CVD in high FSVV cohorts  
403 ( $FSVV \geq 567.27$  Kcal/day:  $r=-0.040$ , 95% CI  $0.023$  to  $0.170$ ,  $p=0.21$ , Table 3) This was contrary  
404 to an analysis of sodium intake versus cardiovascular deaths in 66 countries by Mozaffarian, et.  
405 al who attributed 9.5% of cardiovascular deaths worldwide to high sodium intake.<sup>42</sup> However,  
406 O'Donnell and colleagues found the relationship of sodium to cardiovascular disease to be J  
407 shaped curve and suggested that the lowest cardiovascular risk is with moderate sodium intake in  
408 the 3-5 g/d range.<sup>43</sup> This analysis is consistent with O'Donnell's study.  
409

410

411 The moderately strong positive correlation of child  $\leq 5$  years old severe underweight (weight  $> 2$   
412 SD below the mean for height) with CVD worldwide ( $r=0.306$ , 95% CI 0.285 to 0.325,  
413  $p<0.0001$ , Table 1) suggested a relationship of infant/child malnutrition with later CVD. Babies  
414 surviving the so called “Dutch famine” toward the end of the second world war (1944-45) have  
415 been shown to have higher subsequent heart disease incidence than earlier or later cohorts in  
416 Holland.<sup>44</sup> This suggested that in utero and early infancy severe malnutrition may subsequently  
417 contribute substantially to CVD, especially in developing countries.

418

419 Prematurely stopping breast feeding positively correlated with CVD in the countries with FSVV  
420  $\geq 567.27$  Kcal/day ( $r=0.268$  95% CI: 0.208 to 0.325,  $p=0.0027$ , Table 3). A review of  
421 observational studies of breast feeding related to metabolic risk factors for CVD in developed  
422 countries suggested that breast feeding was associated with increased insulin sensitivity and  
423 decreased systolic blood pressure in later life. Breast feeding also had metabolic benefits for the  
424 mother.<sup>45</sup>

425

426 According to the WHO, ambient air pollution (particulate matter  $\leq 2.5$  micrometers  
427 diameter (PM<sub>2.5</sub>)) causes cardiovascular and respiratory diseases and cancers.<sup>46</sup> The WHO  
428 considers  $>10 \mu\text{g}/\text{m}^3$  of PM<sub>2.5</sub> particles a health hazard. In this GBD data analysis, air  
429 pollution (PM<sub>2.5</sub>) in countries with FSVV  $\geq 567.27$  Kcal/day and mean CVD=273.7  
430 deaths/100k/year averaged  $12.7 \mu\text{g}/\text{m}^3$ . Worldwide, comparable numbers for air pollution  
431 (PM<sub>2.5</sub>) were mean=44.7  $\mu\text{g}/\text{m}^3$  and mean CVD=543.7 (Table 1).

432

433

434 These IHME GBD data support the link of smoking tobacco to CVD ( $r=0.298$ , 95% CI  
435 0.278 to 0.318,  $p<0.0001$ , Table 1). The mean incidence of smoking worldwide=20.5%  
436 (Table 1). In the 34 countries with the lowest CVD, the mean smoking  
437 incidence=23.3% ( $n=974$  cohorts, Table 3). Smoking was clearly a major risk factor  
438 for CVD, but these data suggest that diet was more influential. Given the multiple  
439 dietary and other contributors to CVD, the CVD population attributable fraction  
440 (PAF) for smoking was probably far below the WHO estimate that tobacco accounts  
441 for 20% of coronary artery disease mortality.<sup>47</sup>

442  
443 The positive correlation of blood lead levels with CVD worldwide ( $r=0.180$ , 95% CI 0.159 to  
444 0.201,  $p<0.0001$ , Table 1) was consistent with reports that lead toxicity leads to hypertension.<sup>48</sup>  
445 Also, environmental lead exposure has been linked with all-cause mortality,  
446 cardiovascular disease mortality, and ischaemic heart disease mortality in the US.<sup>49</sup>

447  
448 This analysis showed that kidney disease correlated positively with CVD ( $r=0.194$ , 95% CI  
449 0.173 to 0.215,  $p<0.0001$ , Table 1). A systematic literature review of kidney disease revealed  
450 that chronic kidney disease resulted in an estimated 1.2 million deaths in 2017, of which a large  
451 portion were from CVD.<sup>50</sup> Other CVD risk factors may also lead to kidney disease (e.g., systolic  
452 hypertension, types 1 and 2 diabetes).

453  
454 **Limitations**

455 Our study was subject to all the limitations discussed in previous GBD publications.<sup>51,52</sup> These  
456 included gaps, biases, and inconsistencies in data sources as well as limitations in the methods of

457 data processing and estimation. Having comprehensive data on dietary inputs is key to more  
458 accurate and reliable analyses. These GBD data on animal foods, plant foods, alcohol, sugary  
459 beverages, and fatty acids were not comprehensive and comprised only 1191.4 Kcal/day per  
460 person on average worldwide. Subnational data on all risk factors were available on only four  
461 countries. Because the data formatting and statistical methodology were new, this was  
462 necessarily a post hoc analysis and no pre-analysis protocol was possible. This GBD data  
463 analysis should be repeated with the most recently released GBD 2019 data when those data  
464 become available to volunteer collaborators.

465

#### 466 Generalisability

467 This new the GBD statistical analysis methodology for finding correlations between dietary and  
468 other risk factors and health outcomes (e.g., CVD) can be applied to any of the risk factors and  
469 health outcomes available with the new IHME GBD 2020 data. With further experience with the  
470 methodology, we can determine the generalisability.

471



472 **Conclusion**

473 The lipid hypothesis (e.g., dietary SFA from animal foods and added fats causes CVD) was  
474 consistent with the strong positive correlation of FSVV with CVD in high FSVV cohorts.  
475 However, the lipid hypothesis was not supported worldwide. Global data analysis supported the  
476 fat-soluble vitamin hypothesis because FSVV negatively correlated with CVD worldwide. This  
477 methodology of analysing IHME GBD data might well have advantages over the CRA  
478 systematic literature review and expert opinion method in developing policy recommendations,  
479 clinical practice guidelines, and public health recommendations. The EAT-Lancet Commission  
480 might consider using IHME GBD data to guide another version of a planetary health diet.  
481

482 **Table 1. Dietary and other risks related to CVD worldwide (n=7846 cohorts)**

| CVD and CVD risk factors                                        | Mean   | SD     | Min    | Max     | r      | 95% CI | 95% CI | p      |
|-----------------------------------------------------------------|--------|--------|--------|---------|--------|--------|--------|--------|
| <b>Cardiovascular disease deaths/100k/year ages 15-69 (CVD)</b> | 543.66 | 288.01 | 73.47  | 1844    |        |        |        |        |
| <b>CVD mean m/f</b>                                             | 543.69 | 246.13 | 135.46 | 1727    | 0.855  | 0.849  | 0.860  | <.0001 |
| <b>LDL cholesterol mmol/L</b>                                   | 2.35   | 0.40   | 1.27   | 3.25    | -0.279 | -0.299 | -0.258 | <.0001 |
| <b>Fat-soluble vitamin variable Kcal/day (FSVV)</b>             | 285.36 | 193.31 | 58.78  | 932.18  | -0.329 | -0.349 | -0.309 | <.0001 |
| <b>Processed meat Kcal/day</b>                                  | 5.33   | 9.72   | 0.20   | 68.77   | -0.204 | -0.226 | -0.183 | <.0001 |
| <b>Red meat Kcal/day</b>                                        | 50.27  | 45.13  | 3.21   | 235.95  | -0.232 | -0.253 | -0.211 | <.0001 |
| <b>Fish Kcal/day</b>                                            | 9.99   | 36.52  | 0.40   | 370.36  | -0.203 | -0.224 | -0.181 | <.0001 |
| <b>Milk Kcal/day</b>                                            | 25.04  | 27.05  | 1.06   | 146.82  | -0.192 | -0.214 | -0.171 | <.0001 |
| <b>Poultry Kcal/day available</b>                               | 44.32  | 50.08  | 1.06   | 411.87  | -0.289 | -0.309 | -0.268 | <.0001 |
| <b>Eggs Kcal/day available</b>                                  | 19.36  | 14.71  | 0.79   | 69.64   | -0.390 | -0.408 | -0.371 | <.0001 |
| <b>Added Saturated fatty acids Kcal/day</b>                     | 87.67  | 29.41  | 32.56  | 221.29  | -0.239 | -0.260 | -0.219 | <.0001 |
| <b>Added PUFAs Kcal/day</b>                                     | 37.30  | 33.78  | 1.35   | 175.40  | -0.316 | -0.336 | -0.296 | <.0001 |
| <b>Added Trans fatty acids Kcal/day</b>                         | 6.09   | 6.28   | 0.91   | 35.77   | -0.104 | -0.126 | -0.082 | <.0001 |
| <b>Alcohol Kcal/day</b>                                         | 81.03  | 57.33  | 4.25   | 429.81  | -0.061 | -0.083 | -0.039 | <.0001 |
| <b>Sugary beverages Kcal/day</b>                                | 298.36 | 152.38 | 72.91  | 1472.00 | 0.113  | 0.091  | 0.135  | <.0001 |
| <b>Potatoes Kcal/day available</b>                              | 84.04  | 74.60  | 3.07   | 533.88  | 0.050  | 0.028  | 0.073  | <.0001 |
| <b>Corn Kcal/day available</b>                                  | 34.72  | 48.28  | 0.16   | 305.17  | -0.062 | -0.084 | -0.040 | <.0001 |
| <b>Fruits Kcal/day</b>                                          | 40.21  | 22.50  | 3.58   | 161.39  | -0.355 | -0.374 | -0.336 | <.0001 |
| <b>Vegetables Kcal/day</b>                                      | 79.76  | 43.12  | 9.48   | 304.17  | -0.107 | -0.128 | -0.085 | <.0001 |
| <b>Nuts and seeds Kcal/day</b>                                  | 8.41   | 8.36   | 0.05   | 102.99  | -0.277 | -0.297 | -0.256 | <.0001 |
| <b>Whole grains Kcal/day</b>                                    | 55.65  | 30.93  | 1.14   | 235.10  | -0.194 | -0.216 | -0.173 | <.0001 |
| <b>Legumes Kcal/day</b>                                         | 51.74  | 32.23  | 0.51   | 194.70  | -0.024 | -0.046 | -0.002 | 0.0319 |
| <b>Rice Kcal/day available</b>                                  | 141.86 | 116.34 | 1.42   | 461.80  | 0.007  | -0.015 | 0.029  | 0.5417 |
| <b>Sweet potatoes Kcal/day available</b>                        | 22.76  | 35.95  | 0.02   | 364.74  | -0.167 | -0.189 | -0.146 | <.0001 |
| <b>Total Kcal/day available</b>                                 | 2574   | 418    | 1579   | 3898    | -0.203 | -0.224 | -0.181 | <.0001 |
| <b>Vit A deficiency children/100k/year</b>                      | 23205  | 10939  | 1267   | 50969   | 0.210  | 0.189  | 0.231  | <.0001 |
| <b>Sodium g/d</b>                                               | 4.45   | 2.34   | 1.33   | 9.21    | -0.214 | -0.235 | -0.193 | <.0001 |
| <b>Calcium g/d</b>                                              | 0.301  | 0.179  | 0.081  | 1.044   | -0.169 | -0.191 | -0.148 | <.0001 |
| <b>Dietary fiber g/d</b>                                        | 9.21   | 3.15   | 2.72   | 22.68   | 0.019  | -0.003 | 0.041  | 0.0932 |
| <b>Physical activity METs</b>                                   | 4714   | 1368   | 1609   | 7669    | 0.160  | 0.139  | 0.182  | <.0001 |
| <b>Child underweight &gt;2SD</b>                                | 0.186  | 0.171  | 0.004  | 0.535   | 0.302  | 0.282  | 0.322  | <.0001 |
| <b>Stop breast feeding &lt;6 months</b>                         | 0.119  | 0.055  | 0.016  | 0.242   | -0.302 | -0.322 | -0.282 | <.0001 |
| <b>Ambient pollution PM<sub>0.25</sub></b>                      | 44.73  | 26.46  | 4.38   | 95.54   | 0.153  | 0.131  | 0.174  | <.0001 |
| <b>Smoking rate (0-1)</b>                                       | 0.205  | 0.176  | 0.003  | 0.640   | 0.297  | 0.277  | 0.317  | <.0001 |
| <b>Secondhand smoking (0-1)</b>                                 | 0.376  | 0.155  | 0.164  | 0.796   | -0.225 | -0.246 | -0.204 | <.0001 |
| <b>Sublingual tobacco rate (0-1)</b>                            | 0.068  | 0.095  | 0.001  | 0.419   | 0.284  | 0.264  | 0.304  | <.0001 |
| <b>Blood lead level mcg/dl</b>                                  | 5.01   | 1.01   | 1.22   | 8.37    | 0.180  | 0.159  | 0.201  | <.0001 |
| <b>Household air pollution (0-1)</b>                            | 0.482  | 0.325  | 0.000  | 0.996   | 0.179  | 0.158  | 0.201  | <.0001 |
| <b>Kidney disease stage III (0-1)</b>                           | 0.056  | 0.028  | 0.015  | 0.154   | 0.194  | 0.173  | 0.215  | <.0001 |
| <b>Type 1 DM early deaths</b>                                   | 10.37  | 9.39   | 0.55   | 112.49  | 0.340  | 0.320  | 0.359  | <.0001 |
| <b>Type 2 DM early deaths</b>                                   | 17.50  | 15.65  | 0.63   | 269.67  | 0.227  | 0.205  | 0.247  | <.0001 |
| <b>BMI kg/M<sup>2</sup></b>                                     | 21.77  | 2.29   | 17.95  | 29.39   | -0.240 | -0.261 | -0.219 | <.0001 |
| <b>Fasting plasma glucose mmol/L</b>                            | 4.30   | 0.35   | 3.32   | 5.58    | -0.178 | -0.200 | -0.157 | <.0001 |
| <b>Systolic BP mm Hg</b>                                        | 133.91 | 4.32   | 123.41 | 147.89  | 0.195  | 0.174  | 0.216  | <.0001 |
| <b>Socio-demographic index (0-1)</b>                            | 0.543  | 0.174  | 0.112  | 0.896   | -0.337 | -0.357 | -0.317 | <.0001 |
| <b>Sex male 1 and female 2</b>                                  | 1.50   | 0.50   | 1.00   | 2.00    | -0.395 | -0.414 | -0.376 | <.0001 |

483

484

485 **Table 2. CVD lowest ( $\approx 1$  billion people) and highest 1000 cohorts ( $\approx 1$  billion people)**

| CVD and risk factors                         | CVD lowest $\approx 1$ billion people (n=1000 cohorts) |        |        |        | CVD highest $\approx 1$ billion people (n=1000 cohorts) |        |        |        |
|----------------------------------------------|--------------------------------------------------------|--------|--------|--------|---------------------------------------------------------|--------|--------|--------|
|                                              | Mean                                                   | SD     | Min    | Max    | Mean                                                    | SD     | Min    | Max    |
| Cardiovascular Disease deaths/100k/year      | 227.81                                                 | 95.25  | 73.47  | 422.36 | 1045                                                    | 356.90 | 430.20 | 1844   |
| CVD male/female mean                         | 227.81                                                 | 42.52  | 135.46 | 292.97 | 1045                                                    | 200.47 | 802.24 | 1727   |
| LDL cholesterol mmol/L                       | 2.808                                                  | 0.256  | 1.598  | 3.247  | 2.376                                                   | 0.380  | 1.35   | 3.20   |
| Fat-soluble vitamin variable Kcal/day (FSVV) | 531.4                                                  | 180.20 | 143.63 | 912.69 | 235.66                                                  | 99.68  | 80.53  | 503.98 |
| Processed meat Kcal/day                      | 15.30                                                  | 12.20  | 0.61   | 61.09  | 3.70                                                    | 4.95   | 0.22   | 18.12  |
| Red meat Kcal/day                            | 90.72                                                  | 48.06  | 12.03  | 235.95 | 36.82                                                   | 29.40  | 7.07   | 172.00 |
| Fish Kcal/day                                | 49.54                                                  | 92.63  | 2.85   | 370.36 | 4.56                                                    | 2.69   | 0.78   | 12.97  |
| Milk Kcal/day                                | 55.64                                                  | 35.39  | 7.70   | 146.82 | 25.61                                                   | 16.78  | 1.06   | 75.87  |
| Poultry Kcal/day available                   | 90.44                                                  | 47.27  | 4.74   | 240.56 | 30.23                                                   | 22.39  | 2.78   | 100.04 |
| Eggs Kcal/day available                      | 36.63                                                  | 11.25  | 4.77   | 69.64  | 14.73                                                   | 13.63  | 1.51   | 46.81  |
| Added Saturated fatty acids Kcal/day         | 113.40                                                 | 36.53  | 59.52  | 221.29 | 87.22                                                   | 24.03  | 33.03  | 205.85 |
| Added PUFAs Kcal/day                         | 69.80                                                  | 35.78  | 15.77  | 175.40 | 25.48                                                   | 14.54  | 2.73   | 84.90  |
| Added Trans fatty acids Kcal/day             | 9.91                                                   | 9.25   | 1.65   | 34.90  | 7.31                                                    | 8.62   | 1.21   | 35.77  |
| Alcohol Kcal/day                             | 119.72                                                 | 66.67  | 4.25   | 296.70 | 45.83                                                   | 46.24  | 5.77   | 340.37 |
| Sugary beverages Kcal/day                    | 320.29                                                 | 251.94 | 72.91  | 1472   | 303.30                                                  | 63.68  | 180.80 | 685.42 |
| Potatoes Kcal/day available                  | 81.34                                                  | 51.14  | 9.50   | 177.30 | 98.34                                                   | 96.77  | 3.94   | 533.88 |
| Corn Kcal/day available                      | 48.19                                                  | 75.26  | 1.79   | 287.14 | 31.77                                                   | 37.30  | 0.20   | 305.17 |
| Fruits Kcal/day                              | 64.84                                                  | 16.49  | 23.05  | 128.61 | 31.23                                                   | 13.93  | 3.58   | 70.11  |
| Vegetables Kcal/day                          | 108.02                                                 | 44.60  | 9.48   | 214.26 | 83.83                                                   | 56.67  | 14.43  | 198.51 |
| Nuts and seeds Kcal/day                      | 15.90                                                  | 10.50  | 0.66   | 39.80  | 4.81                                                    | 2.91   | 0.05   | 17.91  |
| Whole grains Kcal/day                        | 64.71                                                  | 38.62  | 1.61   | 173.46 | 28.30                                                   | 33.01  | 1.14   | 156.75 |
| Legumes Kcal/day                             | 47.88                                                  | 25.99  | 2.95   | 133.26 | 31.55                                                   | 18.93  | 0.51   | 103.17 |
| Rice Kcal/day available                      | 78.10                                                  | 97.95  | 7.58   | 349.08 | 75.93                                                   | 107.38 | 1.42   | 461.80 |
| Sweet potatoes Kcal/day available            | 3.92                                                   | 5.14   | 0.04   | 27.51  | 5.84                                                    | 20.20  | 0.02   | 364.74 |
| Total Kcal/day available                     | 2972                                                   | 409    | 1948   | 3572   | 2627                                                    | 409    | 1579   | 3254   |
| Vit A deficiency children/100k/year          | 14181                                                  | 8723   | 1400   | 44100  | 20559                                                   | 11395  | 1722   | 50969  |
| Sodium g/d                                   | 3.92                                                   | 1.22   | 1.33   | 6.70   | 3.30                                                    | 0.76   | 1.33   | 5.96   |
| Calcium g/d                                  | 0.506                                                  | 0.189  | 0.183  | 1.044  | 0.321                                                   | 0.150  | 0.089  | 0.792  |
| Dietary fiber g/d                            | 10.58                                                  | 2.90   | 5.15   | 17.95  | 9.53                                                    | 3.32   | 3.87   | 18.83  |
| Physical activity METs                       | 3802                                                   | 1164   | 2162   | 7607   | 4273                                                    | 1497   | 1838   | 7607   |
| Child underweight >2SD                       | 0.038                                                  | 0.043  | 0.004  | 0.242  | 0.186                                                   | 0.141  | 0.011  | 0.411  |
| Stop breast feeding <6 months                | 0.176                                                  | 0.032  | 0.071  | 0.218  | 0.116                                                   | 0.044  | 0.036  | 0.208  |
| Ambient pollution PM <sub>0.25</sub>         | 17.60                                                  | 8.27   | 4.38   | 38.42  | 40.81                                                   | 22.19  | 7.90   | 77.69  |
| Smoking rate (0-1)                           | 0.217                                                  | 0.121  | 0.012  | 0.448  | 0.212                                                   | 0.190  | 0.005  | 0.627  |
| Secondhand smoking (0-1)                     | 0.328                                                  | 0.097  | 0.164  | 0.569  | 0.397                                                   | 0.158  | 0.164  | 0.780  |
| Sublingual tobacco rate (0-1)                | 0.010                                                  | 0.015  | 0.001  | 0.111  | 0.060                                                   | 0.072  | 0.001  | 0.238  |
| Blood lead level mcg/dl                      | 4.08                                                   | 1.00   | 1.22   | 6.85   | 4.74                                                    | 1.28   | 1.92   | 8.37   |
| Household air pollution (0-1)                | 0.103                                                  | 0.182  | 0.001  | 0.839  | 0.404                                                   | 0.353  | 0.002  | 0.993  |
| Kidney disease stage III (0-1)               | 0.042                                                  | 0.020  | 0.015  | 0.111  | 0.078                                                   | 0.024  | 0.035  | 0.139  |
| Type 1 DM early deaths                       | 4.79                                                   | 3.88   | 0.59   | 20.65  | 16.38                                                   | 15.31  | 2.62   | 112.49 |
| Type 2 DM early deaths                       | 15.69                                                  | 18.23  | 0.75   | 87.92  | 23.65                                                   | 24.88  | 0.89   | 269.67 |
| BMI kg/M <sup>2</sup>                        | 23.74                                                  | 1.60   | 19.61  | 27.06  | 22.46                                                   | 2.15   | 17.95  | 26.08  |
| Fasting plasma glucose mmol/L                | 4.56                                                   | 0.25   | 3.54   | 5.12   | 4.28                                                    | 0.42   | 3.38   | 5.18   |
| Systolic BP mm Hg                            | 133.26                                                 | 4.41   | 123.41 | 142.15 | 136.86                                                  | 4.39   | 124.59 | 147.89 |
| Socio-demographic index (0-1)                | 0.757                                                  | 0.125  | 0.351  | 0.896  | 0.497                                                   | 0.183  | 0.186  | 0.824  |
| Sex male 1 and female 2                      | 1.50                                                   | 0.50   | 1.00   | 2.00   | 1.50                                                    | 0.50   | 1.00   | 2.00   |

486

487 **Table 3. CVD and risk factors for countries with FSVV  $\geq 567.27$  Kcal/day (n=974 cohorts)**

| CVD and CVD risk factors                          | Mean   | SD     | Min   | Max   | r      | 95% CI low | 95% CI high | P      |
|---------------------------------------------------|--------|--------|-------|-------|--------|------------|-------------|--------|
| <b>Cardiovascular deaths/100k/year ages 15-69</b> | 273.72 | 143.95 | 73.47 | 913.2 |        |            |             |        |
| LDL cholesterol mmol/L                            | 2.91   | 0.14   | 2.36  | 3.20  | -0.254 | -0.312     | -0.194      | <.0001 |
| Fat-soluble vitamin variable                      | 692.6  | 111.9  | 527.7 | 932.2 | 0.523  | 0.476      | 0.567       | <.0001 |
| Processed meat Kcal/day                           | 25.01  | 15.30  | 2.16  | 68.77 | 0.459  | 0.408      | 0.507       | <.0001 |
| Red meat Kcal/day                                 | 122.2  | 41.41  | 43.65 | 236.0 | 0.655  | 0.618      | 0.690       | <.0001 |
| Fish Kcal/day                                     | 49.08  | 89.24  | 7.60  | 370.4 | -0.259 | -0.317     | -0.199      | <.0001 |
| Milk Kcal/day                                     | 78.58  | 26.14  | 14.60 | 146.8 | 0.185  | 0.123      | 0.245       | <.0001 |
| Poultry Kcal/day available                        | 130.0  | 60.21  | 41.65 | 411.9 | 0.366  | 0.311      | 0.419       | <.0001 |
| Eggs Kcal/day available                           | 40.80  | 7.25   | 14.59 | 69.64 | -0.242 | -0.301     | -0.182      | <.0001 |
| Saturated fatty acids Kcal/day                    | 299.9  | 66.83  | 129.4 | 481.0 | 0.193  | 0.132      | 0.253       | <.0001 |
| PUFAs Kcal/day                                    | 211.9  | 83.06  | 80.53 | 381.3 | 0.382  | 0.327      | 0.435       | <.0001 |
| Trans fatty acids Kcal/day                        | 25.17  | 17.82  | 4.23  | 66.89 | 0.224  | 0.163      | 0.283       | <.0001 |
| Alcohol Kcal/day                                  | 155.0  | 65.23  | 11.92 | 429.8 | 0.475  | 0.425      | 0.522       | <.0001 |
| Sugary beverages Kcal/day                         | 231.7  | 121.9  | 72.91 | 769.9 | 0.332  | 0.274      | 0.386       | <.0001 |
| Potatoes Kcal/day available                       | 106.4  | 40.47  | 9.50  | 225.0 | 0.109  | 0.046      | 0.170       | 0.00   |
| Corn Kcal/day available                           | 19.45  | 9.41   | 1.79  | 47.39 | 0.086  | 0.024      | 0.148       | 0.01   |
| Fruits Kcal/day                                   | 66.91  | 15.93  | 34.83 | 161.4 | -0.014 | -0.077     | 0.049       | 0.66   |
| Vegetables Kcal/day                               | 117.4  | 34.24  | 42.27 | 304.2 | -0.127 | -0.188     | -0.064      | <.0001 |
| Nuts and seeds Kcal/day                           | 21.98  | 8.91   | 0.85  | 103.0 | 0.177  | 0.115      | 0.237       | <.0001 |
| Whole grains Kcal/day                             | 52.11  | 20.93  | 1.61  | 92.45 | 0.121  | 0.059      | 0.183       | 0.00   |
| Legumes Kcal/day                                  | 40.76  | 25.29  | 2.95  | 133.3 | 0.040  | -0.023     | 0.102       | 0.21   |
| Rice Kcal/day available                           | 38.82  | 46.75  | 6.50  | 179.6 | -0.138 | -0.199     | -0.076      | <.0001 |
| Sweet potatoes Kcal/day available                 | 3.63   | 3.99   | 0.04  | 17.63 | -0.128 | -0.189     | -0.066      | <.0001 |
| Total Kcal/day available                          | 3219   | 292    | 2516  | 3898  | 0.249  | 0.189      | 0.307       | <.0001 |
| <b>Vit A deficiency children/100k/year</b>        | 9316   | 6877   | 1400  | 28081 | -0.105 | -0.166     | -0.042      | 0.00   |
| Sodium g/d                                        | 3.98   | 0.96   | 2.22  | 6.70  | -0.040 | -0.102     | 0.023       | 0.21   |
| Calcium g/d                                       | 0.645  | 0.129  | 0.353 | 1.044 | 0.396  | 0.342      | 0.448       | <.0001 |
| Dietary fiber g/d                                 | 10.62  | 1.75   | 6.30  | 18.15 | 0.241  | 0.181      | 0.299       | <.0001 |
| Physical activity METs                            | 3523   | 765    | 1781  | 5494  | 0.578  | 0.535      | 0.618       | <.0001 |
| Child underweight >2SD                            | 0.015  | 0.013  | 0.004 | 0.058 | -0.197 | -0.257     | -0.136      | <.0001 |
| Stop breast feeding <6 months                     | 0.196  | 0.017  | 0.129 | 0.219 | 0.268  | 0.208      | 0.325       | <.0001 |
| Ambient pollution PM <sub>0.25</sub>              | 12.67  | 7.13   | 4.38  | 87.22 | 0.005  | -0.058     | 0.068       | 0.87   |
| Smoking rate (0-1)                                | 0.233  | 0.084  | 0.021 | 0.444 | 0.233  | 0.172      | 0.291       | <.0001 |
| Secondhand smoking (0-1)                          | 0.309  | 0.070  | 0.201 | 0.586 | -0.306 | -0.362     | -0.248      | <.0001 |
| Sublingual tobacco rate (0-1)                     | 0.013  | 0.020  | 0.001 | 0.125 | 0.579  | 0.536      | 0.620       | <.0001 |
| Blood lead level mcg/dl                           | 3.93   | 0.77   | 1.22  | 5.72  | 0.451  | 0.400      | 0.500       | <.0001 |
| Household air pollution (0-1)                     | 0.012  | 0.026  | 0.000 | 0.201 | -0.011 | -0.073     | 0.052       | 0.74   |
| Kidney disease stage III (0-1)                    | 0.036  | 0.012  | 0.016 | 0.109 | -0.028 | -0.090     | 0.035       | 0.39   |
| Type 1 DM early deaths                            | 3.93   | 2.67   | 0.55  | 15.97 | 0.573  | 0.529      | 0.613       | <.0001 |
| Type 2 DM early deaths                            | 9.54   | 7.52   | 0.75  | 54.22 | 0.622  | 0.582      | 0.659       | <.0001 |
| BMI kg/M <sup>2</sup>                             | 24.87  | 1.78   | 21.40 | 29.39 | 0.484  | 0.434      | 0.530       | <.0001 |
| Fasting plasma glucose mmol/L                     | 4.73   | 0.23   | 3.84  | 5.58  | 0.091  | 0.028      | 0.153       | 0.00   |
| Systolic BP mm Hg                                 | 133.6  | 4.362  | 126.9 | 142.1 | -0.148 | -0.209     | -0.086      | <.0001 |
| Socio-demographic index (0-1)                     | 0.838  | 0.053  | 0.592 | 0.896 | -0.052 | -0.114     | 0.011       | 0.11   |
| Sex male 1 and female 2                           | 1.50   | 0.50   | 1.00  | 2.00  | -0.745 | -0.772     | -0.716      | <.0001 |

488

489

490 **Table 4. CVD related dietary risk factors (Kcal/day) in low CVD countries**

| <b>CVD lowest Countries (n=1000 cohorts)</b> | <b>n cohorts</b> | <b>CVD ascending order</b> | <b>FSVV</b> | <b>Processed meat</b> | <b>Red meat</b> | <b>Fish</b> | <b>Milk</b> | <b>Poultry</b> | <b>Eggs</b> | <b>Added SFA +PUFA +TFA</b> |
|----------------------------------------------|------------------|----------------------------|-------------|-----------------------|-----------------|-------------|-------------|----------------|-------------|-----------------------------|
| <b>Japan</b>                                 | 158              | 169.19                     | 618.69      | 19.19                 | 58.72           | 260.54      | 29.04       | 63.93          | 52.23       | 135.04                      |
| <b>France</b>                                | 64               | 174.00                     | 644.78      | 13.59                 | 135.07          | 11.17       | 95.75       | 99.86          | 43.30       | 246.04                      |
| <b>Switzerland</b>                           | 8                | 175.04                     | 558.41      | 11.50                 | 129.01          | 6.75        | 110.90      | 55.57          | 31.20       | 213.47                      |
| <b>Andorra</b>                               | 2                | 185.55                     | 763.18      | 16.58                 | 150.84          | 16.44       | 99.23       | 189.92         | 47.55       | 242.62                      |
| <b>Peru</b>                                  | 32               | 197.74                     | 183.12      | 1.01                  | 16.92           | 3.82        | 15.34       | 35.04          | 12.03       | 98.95                       |
| <b>Spain</b>                                 | 46               | 206.25                     | 597.93      | 11.65                 | 139.92          | 10.28       | 82.99       | 113.88         | 43.35       | 195.86                      |
| <b>Italy</b>                                 | 60               | 206.44                     | 587.57      | 15.78                 | 126.36          | 9.15        | 89.54       | 84.16          | 36.39       | 226.20                      |
| <b>Iceland</b>                               | 2                | 206.51                     | 609.62      | 11.97                 | 112.73          | 11.67       | 85.37       | 63.57          | 29.51       | 294.81                      |
| <b>Australia</b>                             | 24               | 208.03                     | 698.26      | 9.79                  | 164.14          | 14.15       | 97.05       | 153.33         | 24.92       | 234.89                      |
| <b>Canada</b>                                | 36               | 222.11                     | 624.98      | 25.31                 | 126.28          | 18.48       | 76.13       | 147.46         | 34.94       | 196.39                      |
| <b>Israel</b>                                | 8                | 228.32                     | 662.00      | 5.95                  | 59.50           | 15.35       | 68.79       | 240.56         | 40.54       | 231.30                      |
| <b>South Korea</b>                           | 50               | 232.63                     | 357.23      | 5.97                  | 82.88           | 5.96        | 15.72       | 43.10          | 26.89       | 176.71                      |
| <b>Belgium</b>                               | 12               | 235.98                     | 636.39      | 12.28                 | 122.36          | 11.19       | 93.44       | 85.00          | 33.28       | 278.86                      |
| <b>Netherlands</b>                           | 18               | 236.61                     | 629.56      | 15.72                 | 133.06          | 8.66        | 114.16      | 72.70          | 41.67       | 243.59                      |
| <b>Taiwan</b>                                | 24               | 237.37                     | 587.36      | 3.01                  | 106.58          | 9.15        | 15.95       | 132.38         | 34.87       | 285.41                      |
| <b>Mexico</b>                                | 108              | 237.55                     | 413.25      | 11.29                 | 63.03           | 8.69        | 34.29       | 85.85          | 39.92       | 170.19                      |
| <b>Panama</b>                                | 4                | 244.31                     | 383.83      | 2.75                  | 61.32           | 9.44        | 20.72       | 95.43          | 12.96       | 181.23                      |
| <b>Sweden</b>                                | 10               | 247.21                     | 563.83      | 29.31                 | 119.77          | 11.80       | 124.13      | 45.42          | 35.04       | 198.37                      |
| <b>New Zealand non Mauri</b>                 | 4                | 247.32                     | 699.81      | 9.31                  | 158.86          | 11.56       | 88.74       | 128.14         | 40.24       | 262.95                      |
| <b>Norway</b>                                | 32               | 248.72                     | 605.30      | 48.14                 | 109.37          | 10.10       | 100.96      | 41.65          | 31.52       | 263.56                      |
| <b>England</b>                               | 20               | 253.09                     | 534.56      | 19.21                 | 96.29           | 10.70       | 87.80       | 89.30          | 32.90       | 198.36                      |
| <b>Costa Rica</b>                            | 4                | 260.73                     | 408.42      | 2.63                  | 51.74           | 8.12        | 46.55       | 78.05          | 28.17       | 193.14                      |
| <b>Luxembourg</b>                            | 2                | 262.53                     | 578.00      | 14.65                 | 163.17          | 11.79       | 91.99       | 71.48          | 27.60       | 197.32                      |
| <b>Chile</b>                                 | 18               | 267.50                     | 404.12      | 19.11                 | 90.33           | 9.65        | 31.93       | 97.29          | 19.70       | 136.10                      |
| <b>Guatemala</b>                             | 16               | 269.85                     | 231.05      | 1.89                  | 20.05           | 5.28        | 13.32       | 53.94          | 30.46       | 106.12                      |
| <b>Kenya</b>                                 | 12               | 270.04                     | 150.04      | 1.41                  | 25.83           | 3.09        | 18.89       | 4.74           | 4.77        | 91.31                       |
| <b>Ecuador</b>                               | 16               | 270.64                     | 375.35      | 6.87                  | 56.88           | 7.34        | 35.51       | 59.92          | 14.66       | 194.16                      |
| <b>USA</b>                                   | 94               | 274.00                     | 825.54      | 36.45                 | 136.35          | 15.79       | 90.90       | 190.90         | 41.10       | 314.05                      |
| <b>Denmark</b>                               | 6                | 275.10                     | 600.48      | 14.46                 | 137.75          | 13.38       | 98.01       | 74.42          | 45.96       | 216.51                      |
| <b>Austria</b>                               | 8                | 277.67                     | 621.00      | 8.95                  | 194.65          | 9.26        | 98.68       | 70.00          | 39.96       | 199.50                      |
| <b>Portugal</b>                              | 10               | 278.50                     | 524.81      | 5.16                  | 124.77          | 8.77        | 79.43       | 94.26          | 24.18       | 188.25                      |
| <b>Nicaragua</b>                             | 6                | 282.04                     | 214.24      | 1.52                  | 14.93           | 4.07        | 20.66       | 41.76          | 17.41       | 113.90                      |
| <b>Tehran (Iran)</b>                         | 16               | 283.29                     | 299.65      | 1.23                  | 22.63           | 5.36        | 19.23       | 65.90          | 18.89       | 166.41                      |
| <b>Thailand</b>                              | 70               | 289.91                     | 247.43      | 0.70                  | 32.01           | 6.95        | 7.85        | 57.07          | 31.10       | 111.75                      |
| <b>Total cohorts</b>                         | 1000             |                            |             |                       |                 |             |             |                |             |                             |

491

492

493 **Table 5. Representative examples of low CVD countries including all risk factors**

| Countries                                                           | Japan <sup>a</sup> | France <sup>b</sup> | Peru <sup>c</sup>  | Mexico <sup>d</sup> | Panama <sup>e</sup>        | Guatemala <sup>f</sup>     | Ecuador <sup>g</sup> |
|---------------------------------------------------------------------|--------------------|---------------------|--------------------|---------------------|----------------------------|----------------------------|----------------------|
| <b>n cohorts</b>                                                    | 158                | 64                  | 32                 | 108                 | 4                          | 16                         | 16                   |
| <b>CVD/100k/year ages 15-69</b>                                     | 169.19             | 174.00              | 197.74             | 237.55              | 244.31                     | 269.85                     | 270.64               |
| <b>Fat-soluble vitamin variable</b>                                 | 618.69             | 644.78              | 183.12             | 413.25              | 383.83                     | 231.05                     | 375.35               |
| <b>LDL cholesterol mmol/L</b>                                       | 2.81               | 3.08                | 2.37               | 2.59                | 2.61                       | 2.20                       | 2.46                 |
| <b>Processed meat Kcal/day</b>                                      | 19.19              | 13.59               | 1.01               | 11.29               | 2.75                       | 1.89                       | 6.87                 |
| <b>Red meat Kcal/day</b>                                            | 58.72              | 135.07              | 16.92              | 63.03               | 61.32                      | 20.05                      | 56.88                |
| <b>Fish Kcal/day</b>                                                | 260.54             | 11.17               | 3.82               | 8.69                | 9.44                       | 5.28                       | 7.34                 |
| <b>Milk Kcal/day</b>                                                | 29.04              | 95.75               | 15.34              | 34.29               | 20.72                      | 13.32                      | 35.51                |
| <b>Poultry Kcal/day available</b>                                   | 63.93              | 99.86               | 35.04              | 85.85               | 95.43                      | 53.94                      | 59.92                |
| <b>Eggs Kcal/day available</b>                                      | 52.23              | 43.30               | 12.03              | 39.92               | 12.96                      | 30.46                      | 14.66                |
| <b>Added Saturated fatty acids Kcal/day</b>                         | 77.73              | 172.79              | 68.34              | 89.13               | 101.32                     | 60.62                      | 133.54               |
| <b>Added PUFAs Kcal/day</b>                                         | 53.78              | 67.38               | 24.47              | 52.14               | 72.29                      | 41.90                      | 51.69                |
| <b>Added Trans fatty acids Kcal/day</b>                             | 3.54               | 5.88                | 6.13               | 28.92               | 7.62                       | 3.60                       | 8.93                 |
| <b>Alcohol Kcal/day</b>                                             | 183.16             | 118.64              | 55.79              | 58.39               | 27.44                      | 28.79                      | 59.77                |
| <b>Sugary beverages Kcal/day</b>                                    | 94.78              | 323.88              | 284.76             | 847.81              | 921.54                     | 964.08                     | 283.57               |
| <b>Potatoes Kcal/day available</b>                                  | 42.29              | 126.40              | 142.55             | 25.79               | 32.01                      | 16.68                      | 67.56                |
| <b>Corn Kcal/day available</b>                                      | 27.58              | 23.85               | 33.54              | 242.41              | 50.86                      | 206.19                     | 11.76                |
| <b>Fruits Kcal/day</b>                                              | 44.43              | 59.56               | 52.27              | 65.68               | 52.92                      | 39.61                      | 107.07               |
| <b>Vegetables Kcal/day</b>                                          | 149.32             | 101.07              | 46.17              | 60.72               | 27.81                      | 54.98                      | 31.79                |
| <b>Nuts and seeds Kcal/day</b>                                      | 9.26               | 16.94               | 1.02               | 6.27                | 1.92                       | 12.72                      | 0.68                 |
| <b>Whole grains Kcal/day</b>                                        | 76.05              | 16.16               | 58.94              | 142.06              | 83.46                      | 68.32                      | 43.78                |
| <b>Legumes Kcal/day</b>                                             | 71.84              | 17.07               | 45.78              | 76.99               | 38.35                      | 73.84                      | 21.99                |
| <b>Rice Kcal/day available</b>                                      | 124.52             | 12.09               | 93.09              | 14.07               | 141.66                     | 13.46                      | 118.02               |
| <b>Sweet potatoes Kcal/day available</b>                            | 12.09              | 0.04                | 7.94               | 0.69                | 8.67                       | 1.71                       | 0.49                 |
| <b>Total Kcal/day available</b>                                     | 2590               | 3406                | 1948               | 3015                | 2288                       | 2330                       | 2273                 |
| <b>Vit A deficiency children/100k/year</b>                          | 8151               | 1643                | 19372              | 23939               | 11463                      | 17947                      | 20185                |
| <b>Sodium g/d</b>                                                   | 6.01               | 3.21                | 3.14               | 2.62                | 2.97                       | 1.83                       | 3.16                 |
| <b>Calcium g/d</b>                                                  | 0.425              | 0.707               | 0.299              | 0.370               | 0.293                      | 0.220                      | 0.314                |
| <b>Dietary fiber g/d</b>                                            | 13.43              | 8.68                | 9.44               | 15.51               | 5.90                       | 12.54                      | 6.25                 |
| <b>Physical activity METs</b>                                       | 3460               | 2795                | 3774               | 3833                | 4935                       | 6142                       | 3740                 |
| <b>Child underweight &gt;2SD</b>                                    | 0.045              | 0.012               | 0.069              | 0.050               | 0.042                      | 0.193                      | 0.096                |
| <b>Stop breast feeding &lt;6 months</b>                             | 0.171              | 0.208               | 0.108              | 0.171               | 0.140                      | 0.087                      | 0.130                |
| <b>Ambient pollution PM<sub>0.25</sub></b>                          | 13.10              | 13.87               | 28.99              | 24.28               | 13.24                      | 28.61                      | 17.86                |
| <b>Smoking rate (0-1)</b>                                           | 0.268              | 0.289               | 0.075              | 0.149               | 0.073                      | 0.077                      | 0.080                |
| <b>Secondhand smoking (0-1)</b>                                     | 0.353              | 0.320               | 0.238              | 0.344               | 0.178                      | 0.224                      | 0.206                |
| <b>Sublingual tobacco rate (0-1)</b>                                | 0.012              | 0.003               | 0.004              | 0.002               | 0.002                      | 0.001                      | 0.004                |
| <b>Blood lead level mcg/dl</b>                                      | 2.65               | 3.86                | 5.17               | 5.34                | 4.80                       | 5.89                       | 4.51                 |
| <b>Household air pollution (0-1)</b>                                | 0.002              | 0.010               | 0.454              | 0.213               | 0.193                      | 0.627                      | 0.080                |
| <b>Kidney disease stage III (0-1)</b>                               | 0.038              | 0.028               | 0.050              | 0.078               | 0.068                      | 0.075                      | 0.055                |
| <b>Type 1 DM early deaths</b>                                       | 1.25               | 2.91                | 4.84               | 12.64               | 7.71                       | 12.03                      | 6.92                 |
| <b>Type 2 DM early deaths</b>                                       | 2.03               | 3.70                | 11.37              | 60.97               | 18.07                      | 40.38                      | 27.44                |
| <b>BMI kg/M<sup>2</sup></b>                                         | 21.89              | 23.47               | 23.29              | 24.82               | 22.98                      | 21.97                      | 25.04                |
| <b>Fasting plasma glucose mmol/L</b>                                | 4.77               | 4.46                | 4.01               | 4.53                | 4.31                       | 4.12                       | 4.26                 |
| <b>Systolic BP mm Hg</b>                                            | 137.56             | 135.11              | 125.19             | 130.31              | 133.66                     | 131.15                     | 126.85               |
| <b>Socio-demographic index</b>                                      | 0.828              | 0.822               | 0.590              | 0.608               | 0.644                      | 0.431                      | 0.575                |
| <b>Likely mechanism of low CVD (see discussion for explanation)</b> | FSVV, Plants       | FSVV                | Smoking, metabolic | FSVV, Plants        | Physical activity, smoking | Physical activity, smoking | FSVV, smoking        |

494 <sup>a</sup> Japan not only had high FSVV but also had relatively high intake of healthy plant foods (fruits,  
495 vegetables, nuts and seeds, whole grains, and legumes: 350.9 Kcal/day).

496 <sup>b</sup> France was characteristic of 23 other low CVD countries in that intake of milk products was  
497 high (France milk=95.75 Kcal/day and in the other 23 countries' milk>68 Kcal/day, Table 3  
498 compared with worldwide mean milk=25.04 Kcal/day, Table 1).

499 <sup>c</sup> The low CVD of Peru might be attributed to a relatively low smoking rate (7.5%) and good  
500 metabolic statistics (mean BMI=23.3 Kg/M<sup>2</sup>, mean FPG=4.01 mmol/L, mean LDL-C=2.37  
501 mmol/L, mean SBP=125.2 mm/Hg).

502 <sup>d</sup> While Mexico had a lower FSVV than most low CVD countries (Mexico FSVV=413.3  
503 Kcal/day), like Japan it had relatively high intake of important plant foods (fruits, vegetables,  
504 nuts and seeds, whole grains, and legumes: totaling 351.7 Kcal/day).

505 <sup>e</sup> Panama, with moderate FSVV=383.8 Kcal/day, had relatively high physical activity (Panama  
506 physical activity=4935 METs) and low smoking rate (male/female mean smoking=7.3%).

507 <sup>f</sup> While Guatemala had relatively low FSVV (FSVV=231.1 Kcal/day) and low healthy plant food  
508 intake (fruits, vegetables, nuts and seeds, whole grains, and legumes: 249.5 Kcal/day), it had  
509 relatively high physical activity (physical activity=6142 METs) and a low smoking rate  
510 (male/female mean smoking=7.7%).

511 <sup>g</sup> Ecuador had an intermediary FSVV (FSVV=375.4 Kcal/day) and relatively low intake of  
512 important plant foods (fruits, vegetables, nuts and seeds, whole grains, and legumes: totaling  
513 205.3 Kcal/day). However, Ecuador had a low rate of smoking (male/female mean  
514 smoking=8.0%). and a low SBP (mean SBP=126.9 mm/Hg).

515

516

517 **Supplementary Table 1. Definitions of GBD risk factors and covariates related to CVD**

| <b>Variables</b>                                | <b>Definition</b>                                                                                                                                                                                                                                                                                                                 |
|-------------------------------------------------|-----------------------------------------------------------------------------------------------------------------------------------------------------------------------------------------------------------------------------------------------------------------------------------------------------------------------------------|
| <b>Alcohol</b>                                  | Any alcohol consumption (g/day)                                                                                                                                                                                                                                                                                                   |
| <b>Ambient particulate matter pollution</b>     | Annual average daily exposure to outdoor air concentrations of particulate matter with an aerodynamic diameter of $\leq 2.5 \mu\text{g}/\text{m}^3$ (PM <sub>2.5</sub> )                                                                                                                                                          |
| <b>Body-mass index</b>                          | Body mass index (BMI) ( $\text{kg}/\text{m}^2$ )—the dependent variable of interest                                                                                                                                                                                                                                               |
| <b>Chewing tobacco</b>                          | Current use of any chewing tobacco product                                                                                                                                                                                                                                                                                        |
| <b>Child underweight</b>                        | Proportion of children – 3 SD to – 2 SD of the WHO 2006 standard weight-for-age curve (0-1)                                                                                                                                                                                                                                       |
| <b>Corn</b>                                     | Corn availability per capita (g/day), a covariate                                                                                                                                                                                                                                                                                 |
| <b>Discontinued breast feeding</b>              | Proportion of children aged 6-23 months who do not receive any breast milk                                                                                                                                                                                                                                                        |
| <b>Eggs</b>                                     | Eggs availability per capita (g/day) a covariate                                                                                                                                                                                                                                                                                  |
| <b>Fasting plasma glucose</b>                   | Fasting plasma glucose (mmol/L)                                                                                                                                                                                                                                                                                                   |
| <b>Fish</b>                                     | This variable expressed in g/day was derived by determining the weight of fish in g corresponding to 1 g of omega-3 fatty acids (eicosapentaenoic acid and docosahexaenoic acid) by averaging the fish g per 1 g of omega-3 fatty acids 20 species of fish= 117.04 g/day fish/1 g/day omega-3 fatty acids (Supplementary Table 3) |
| <b>Fruits</b>                                   | Consumption of fruits (includes fresh, frozen, cooked, canned, or dried fruit but excludes fruit juices and salted or pickled fruits) (g/day)                                                                                                                                                                                     |
| <b>Household air pollution from solid fuels</b> | Individual exposure to PM <sub>2.5</sub> due to use of solid cooking fuel                                                                                                                                                                                                                                                         |
| <b>Kidney function impaired</b>                 | Proportion of the population with ACR $>30 \text{ mg}/\text{g}$ or GFR $<60 \text{ mL}/\text{min}/1.73 \text{ m}^2$ , excluding end-stage renal disease                                                                                                                                                                           |
| <b>Kilocalories available /day</b>              | The mean number of kilocalories per capita available per day to people in each location (kcal/day available), a covariate                                                                                                                                                                                                         |
| <b>LDL cholesterol</b>                          | Serum low-density lipoprotein cholesterol (mmol/L)                                                                                                                                                                                                                                                                                |
| <b>Lead exposure</b>                            | Blood lead levels in $\mu\text{g}/\text{dL}$ of blood, bone lead levels in $\mu\text{g}/\text{g}$ of bone                                                                                                                                                                                                                         |
| <b>Legumes</b>                                  | Consumption of beans, lentils, pulses (g/day)                                                                                                                                                                                                                                                                                     |
| <b>Milk</b>                                     | Consumption of milk including non-fat, low-fat, and full-fat milk but excluding soy milk and other plant derivatives (g/day)                                                                                                                                                                                                      |
| <b>Nuts and seeds</b>                           | Consumption of nuts and seeds (g/day)                                                                                                                                                                                                                                                                                             |
| <b>Physical activity</b>                        | Average weekly physical activity at work, home, transport-related and recreational measured by MET min per week. Less than 3000 METs per week constitutes low physical activity.                                                                                                                                                  |
| <b>Poultry</b>                                  | Poultry availability per capita (g/day), a covariate                                                                                                                                                                                                                                                                              |
| <b>Potatoes</b>                                 | Potatoes availability per capita (g/day), a covariate                                                                                                                                                                                                                                                                             |
| <b>Processed meat</b>                           | Consumption of any processed meat (includes meat preserved by smoking, curing, salting, or addition of chemical preservatives, including bacon, salami, sausages, or deli or luncheon meats like ham, turkey, and pastrami) (g/day)                                                                                               |
| <b>Red meat</b>                                 | Consumption of red meat (includes beef, pork, lamb, and goat but excludes poultry, fish, eggs, and all processed meats) (g/day)                                                                                                                                                                                                   |
| <b>Rice</b>                                     | Rice availability per capita (g/day), a covariate                                                                                                                                                                                                                                                                                 |
| <b>Seafood omega-3 fatty acids</b>              | Seafood omega-3 fatty acids (eicosapentaenoic acid and docosahexaenoic acid) in tablet or fish form (g/day)                                                                                                                                                                                                                       |
| <b>Second-hand smoke</b>                        | Average daily exposure to air particulate matter from second-hand smoke with an aerodynamic diameter smaller than $2.5 \mu\text{g}$ , measured in $\mu\text{g}/\text{m}^3$ , among non-smokers                                                                                                                                    |
| <b>Smoking</b>                                  | Prevalence of current use of any smoked tobacco product and prevalence of former use of any smoked tobacco product; among current smokers, cigarette equivalents smoked per smoker per day and cumulative pack-years of exposure; among former smokers, number of years since quitting                                            |
| <b>Socio-demographic index</b>                  | SDI is a composite indicator of development status that was originally constructed for GBD 2015 and is derived from components that correlate strongly with health outcomes.                                                                                                                                                      |



|                                  |                                                                                                                                                                                                                                                                                                        |
|----------------------------------|--------------------------------------------------------------------------------------------------------------------------------------------------------------------------------------------------------------------------------------------------------------------------------------------------------|
|                                  | It is the geometric mean for indices of the total fertility rate among women younger than 25 years, mean education for those aged 15 years or older, and lag-distributed income per capita. The resulting metric ranges from 0 to 1, with higher values corresponding to higher levels of development. |
| <b>Sugar-sweetened beverages</b> | Consumption of any beverage with $\geq 50$ calories of sugar per one-cup serving, including carbonated beverages, sodas, energy drinks, fruit drinks but excluding 100% fruit and vegetable juices (g/day)                                                                                             |
| <b>Sweet potatoes</b>            | Sweet potato availability per capita (g/day), a covariate                                                                                                                                                                                                                                              |
| <b>Systolic blood pressure</b>   | Systolic blood pressure (mm Hg)                                                                                                                                                                                                                                                                        |
| <b>Total sugar</b>               | Total sugar availability per capita (g/day), a covariate                                                                                                                                                                                                                                               |
| <b>Vegetables</b>                | Consumption of frozen, cooked, canned, or dried vegetables (including legumes but excluding salted or pickled, juices, nuts and seeds, and starchy vegetables such as potatoes or corn) (g/day)                                                                                                        |
| <b>Vitamin A deficiency</b>      | Proportion of children aged 0–5 years with serum retinol concentration $< 0.7 \mu\text{mol/L}$                                                                                                                                                                                                         |
| <b>Whole grains</b>              | Consumption of whole grains (bran, germ, and endosperm in their natural proportions) from breakfast cereals, bread, rice, pasta, biscuits, muffins, tortillas, pancakes, and others (g/day)                                                                                                            |

518

519

520

521 **Supplementary Table 2. Omega-3 Fatty Acid g to fish g calculation¶**

| <b>Fish</b>                                                    | <b>DHA<br/>g/3-ounce<br/>fish</b> | <b>EPA<br/>g/3-<br/>ounce<br/>fish</b> | <b>Omega-3 Fatty<br/>Acids (DHA _<br/>EPA) g/3-ounce<br/>fish mean</b> | <b>Fish 3<br/>ounces =<br/>85.02 g</b> | <b>Fish (g) per<br/>omega-3 Fatty<br/>Acids<br/>(g)=85.02 /<br/>0.7264</b> |
|----------------------------------------------------------------|-----------------------------------|----------------------------------------|------------------------------------------------------------------------|----------------------------------------|----------------------------------------------------------------------------|
| <b>Salmon Atlantic farmed</b>                                  | 1.24                              | 0.59                                   |                                                                        |                                        |                                                                            |
| <b>Salmon Atlantic wild</b>                                    | 1.22                              | 0.35                                   |                                                                        |                                        |                                                                            |
| <b>Herring Atlantic</b>                                        | 0.94                              | 0.77                                   |                                                                        |                                        |                                                                            |
| <b>Sardines canned in tomato sauce<br/>drained</b>             | 0.74                              | 0.45                                   |                                                                        |                                        |                                                                            |
| <b>Mackerel Atlantic</b>                                       | 0.59                              | 0.43                                   |                                                                        |                                        |                                                                            |
| <b>Salmon pink canned drained</b>                              | 0.63                              | 0.28                                   |                                                                        |                                        |                                                                            |
| <b>Trout rainbow wild</b>                                      | 0.44                              | 0.40                                   |                                                                        |                                        |                                                                            |
| <b>Oysters eastern wild</b>                                    | 0.23                              | 0.30                                   |                                                                        |                                        |                                                                            |
| <b>Sea bass</b>                                                | 0.47                              | 0.18                                   |                                                                        |                                        |                                                                            |
| <b>Shrimp</b>                                                  | 0.12                              | 0.12                                   |                                                                        |                                        |                                                                            |
| <b>Lobster</b>                                                 | 0.07                              | 0.10                                   |                                                                        |                                        |                                                                            |
| <b>Tuna light canned in water<br/>drained</b>                  | 0.17                              | 0.02                                   |                                                                        |                                        |                                                                            |
| <b>Tilapia</b>                                                 | 0.11                              |                                        |                                                                        |                                        |                                                                            |
| <b>Scallops</b>                                                | 0.09                              | 0.06                                   |                                                                        |                                        |                                                                            |
| <b>Cod Pacific</b>                                             | 0.1                               | 0.04                                   |                                                                        |                                        |                                                                            |
| <b>Tuna yellowfin</b>                                          | 0.09                              | 0.01                                   |                                                                        |                                        |                                                                            |
| <b>Mean DHA and EPA Omega-3<br/>Fatty Acids g/3 ounce fish</b> | 0.4531                            | 0.2733                                 |                                                                        |                                        |                                                                            |
| <b>Calculations total Omega-3 FA g<br/>to fish g</b>           |                                   |                                        | 0.7264                                                                 | 85.02                                  | 117.043                                                                    |

522 ¶ Data on omega-3 fatty acid content of varieties of fish came from the National Institutes of  
523 Health Office of Dietary Supplements (USA)

524

525

526 **Supplementary Table 3. Calculations of KC/d from g/day of animal and plant foods¶**

| <b>Foods</b>                     | <b>Food sub-categories</b> | <b>Mean kcal/serving</b> | <b>Mean g/serving</b> | <b>Mean kcal/g</b> |
|----------------------------------|----------------------------|--------------------------|-----------------------|--------------------|
| <b>Milk (2% fat)</b>             |                            | 122                      | 244                   | 0.5                |
| <b>Fish</b>                      |                            | 218                      | 170                   | 1.28               |
| <b>Eggs</b>                      |                            | 72                       | 50                    | 1.44               |
| <b>Poultry</b>                   |                            | 187                      | 85                    | 2.91               |
| <b>Red meat</b>                  |                            | 247                      | 85                    | 2.91               |
| <b>Processed meat</b>            |                            |                          |                       |                    |
|                                  | <b>Salami</b>              | 222                      | 59                    | 3.76               |
|                                  | <b>Pastrami</b>            | 104                      | 71                    | 1.46               |
|                                  | <b>Ring baloney</b>        | 86                       | 28                    | 3.07               |
|                                  | <b>Pepperoni</b>           | 94                       | 100                   | 0.94               |
| <b>Average processed meat</b>    |                            | 126.5                    | 64.5                  | 1.96               |
| <b>Fruits</b>                    |                            | 97                       | 162                   | 0.60               |
| <b>Vegetables</b>                |                            | 59                       | 91                    | 0.65               |
| <b>Legumes</b>                   |                            | 249                      | 179                   | 1.39               |
| <b>Nuts</b>                      |                            | 172                      | 28                    | 6.14               |
| <b>Seeds</b>                     |                            |                          |                       |                    |
|                                  | <b>Flax seeds</b>          | 55                       | 10                    | 5.5                |
|                                  | <b>Chia seeds</b>          | 58                       | 12                    | 4.83               |
|                                  | <b>Fennel seeds</b>        | 34.5                     | 10                    | 3.45               |
|                                  | <b>Hemp seeds</b>          | 55.3                     | 10                    | 5.53               |
| <b>Average of seeds</b>          |                            | 50.7                     | 10.5                  | 4.83               |
| <b>Average of nuts and seeds</b> |                            | 111.4                    | 19.25                 | 5.78               |
| <b>Corn</b>                      |                            | 99                       | 103                   | 0.96               |
| <b>Potatoes</b>                  |                            | 161                      | 173                   | 0.93               |
| <b>Sweet potatoes</b>            |                            | 115                      | 151                   | 0.76               |
| <b>Rice</b>                      |                            | 205                      | 158                   | 1.3                |
| <b>Whole grains</b>              |                            | 120                      | 52                    | 2.31               |

527 ¶ Source: NutritionIX app<sup>12</sup>

528

529 **Article information**

530 **Corresponding author: David K. Cundiff, MD, Independent researcher**

531 ([davidkcundiff@gmail.com](mailto:davidkcundiff@gmail.com)).

532

533 **Contributors**

534 DKC had full access to the GBD data in the study and takes responsibility for the integrity of the  
535 data and the accuracy of the data analysis. DKC conceived and designed the study, acquired and  
536 analysed the GBD data from IHME, interpreted the study findings, drafted the manuscript,  
537 critically reviewed and edited the manuscript and tables, and approved the final version for  
538 publication.

539

540 CW designed software programs in R to format and population weight the data,  
541 aided with the SAS statistical analysis, critically reviewed the manuscript, and  
542 approved the final version for publication.

543

544 **Competing interest disclosures:** None reported.

545

546 **Competing interests' statement:** Both authors have completed the ICMJE uniform disclosure  
547 form at [www.icmje.org/coi\\_disclosure.pdf](http://www.icmje.org/coi_disclosure.pdf) and declare: no support from any Organization for the  
548 submitted work; no financial relationships with any organizations that might have an interest in  
549 the submitted work in the previous three years; no other relationships or activities that could  
550 appear to have influenced the submitted work.

551•

552 **Funding/Support:** This research received no grant from any funding agency in the public,  
553 commercial or not-for-profit sectors. The Bill and Melinda Gates Foundation funded the  
554 acquisition of the data by the IHME for this analysis.

555  
556 **Role of the Funder/Sponsor:** The IHME provided the data for this analysis but neither the  
557 IHME nor Bill and Melinda Gates Foundation had any role in the analysis of the data.

558  
559 **Data Sharing Statement:** The formatted analysis dataset for this analysis, SAS codes, and Excel  
560 files are posted on the Mendeley data repository  
561 <https://data.mendeley.com/datasets/g6b39zxck4/6>

562  
563 **Additional Contributions**

564 We thank Scott Glenn and Brent Bell from IHME who supplied us with the GBD risk factor  
565 exposure data.

566  
567 **Checklist:** This report followed the STrengthening the Reporting of OBServational studies in  
568 Epidemiology (STROBE) guidelines for reporting global health estimates.<sup>53</sup>

569

## 570 References

- 571 1. Teicholz N. **The scientific report guiding the US dietary guidelines: is it scientific?**  
572 *BMJ*. 2015; **351**. <http://www.bmj.com/bmj/351/bmj.h4962.full.pdf>
- 573 2. Teicholz N. **The scientific report guiding the US dietary guidelines: is it scientific?**  
574 **Rapid responses.** *BMJ*. 2015; **351**: h4962.  
575 <https://www.bmj.com/content/351/bmj.h4962/rapid-responses>
- 576 3. Global Burden of Disease Study 2017 (GBD 2017) Data Resources. Seattle,  
577 Washington: Institute of Health Metrics and Evaluation 2018; Accessed.  
578 <http://ghdx.healthdata.org/gbd-2017>
- 579 4. Global Health Data Exchange. Seattle, WA: Institute of Health Metrics and Evaluation  
580 2017; Accessed January 10, 2020. <http://ghdx.healthdata.org/>
- 581 5. Naghavi M, Abajobir AA, Abbafati C, et al. **Global, regional, and national age-sex  
582 specific mortality for 264 causes of death, 1980–2016: a systematic analysis for the  
583 Global Burden of Disease Study 2016.** *The Lancet*. 2017; **390** (10100): 1151-1210.  
584 [https://doi.org/10.1016/S0140-6736\(17\)32152-9](https://doi.org/10.1016/S0140-6736(17)32152-9)
- 585 6. Flaxman AD, Lee YY, Vos T, et al. *An Integrative Metaregression Framework for  
586 Descriptive Epidemiology*. Seattle, WA: University of Washington Press, 2015.
- 587 7. **GBD 2017 Risk Factor Collaborators. Global, regional, and national comparative  
588 risk assessment of 84 behavioural, environmental and occupational, and metabolic  
589 risks or clusters of risks for 195 countries and territories, 1990–2017: a systematic  
590 analysis for the Global Burden of Disease Study 2017: Table of risk factor  
591 definitions.** *The Lancet*. 2018; **392** (10159): 1923-94.  
592 [https://www.thelancet.com/action/showFullTableHTML?isHtml=true&tableId=tbl1&pii=  
593 S0140-6736%2818%2932225-6](https://www.thelancet.com/action/showFullTableHTML?isHtml=true&tableId=tbl1&pii=S0140-6736%2818%2932225-6)
- 594 8. PROTOCOL FOR THE GLOBAL BURDEN OF DISEASES, INJURIES, AND RISK  
595 FACTORS STUDY (GBD) Version 3.0; Issue 26. Seattle, Washington: Institute for  
596 Health Metrics and Evaluation Accessed August 2, 2019.  
597 [http://www.healthdata.org/sites/default/files/files/Projects/GBD/GBD\\_Protocol.pdf](http://www.healthdata.org/sites/default/files/files/Projects/GBD/GBD_Protocol.pdf)
- 598 9. Food and Agriculture Organization of the United Nations. . United Nations Accessed  
599 August 26, 2021. <http://www.fao.org/faostat/en/#data>
- 600 10. Call for Collaborators. . Seattle, Washington: Institute for Health Metrics and Evaluation  
601 at the University of Washington 2019; Accessed April 25, 2019.  
602 <http://www.healthdata.org/gbd/call-for-collaborators>
- 603 11. Omega 3 Fatty Acids: Fact Sheet for Health Professionals. The Office of Dietary  
604 Supplements 2018; Accessed September 1, 2018.  
605 <https://ods.od.nih.gov/factsheets/Omega3FattyAcids-HealthProfessional/>
- 606 12. Nutritionix Track App. Syndigo LLC Accessed April 25, 2019.  
607 <https://www.nutritionix.com/>
- 608 13. Ritchie H, Roser M. **Diet Compositions.** *Our World in Data*. 2017.  
609 <https://ourworldindata.org/diet-compositions>
- 610 14. Willett W, Rockström J, Loken B, et al. **Food in the Anthropocene: the EAT-Lancet  
611 Commission on healthy diets from sustainable food systems.** *The Lancet*. 2019; **393**  
612 (10170): 447-492. [https://doi.org/10.1016/S0140-6736\(18\)31788-4](https://doi.org/10.1016/S0140-6736(18)31788-4)

- 613 15. Noncommunicable diseases: Mortality Geneva, Switzerland: World Health Organization  
614 2021; Accessed August 25, 2021.  
615 <https://www.who.int/data/gho/data/themes/topics/topic-details/GHO/ncd-mortality>
- 616 16. Zagmutt FJ, Pouzou JG, Costard S. **The EAT-Lancet Commission: a flawed**  
617 **approach?** *The Lancet*. 2019; **394** (10204): 1140-1141. [https://doi.org/10.1016/S0140-](https://doi.org/10.1016/S0140-6736(19)31903-8)  
618 [6736\(19\)31903-8](https://doi.org/10.1016/S0140-6736(19)31903-8)
- 619 17. Torjesen I. **WHO pulls support from initiative promoting global move to plant**  
620 **based foods.** *BMJ*. 2019; **365**: 11700.  
621 <https://www.bmj.com/content/bmj/365/bmj.11700.full.pdf>
- 622 18. Willett W, Rockström J, Lang T, et al. Healthy Diets From Sustainable Food Systems,  
623 Food Planet Health: Target 1 Healthy Diets pg 10. Stockholm, Sweden: EAT--  
624 Established by the Stordalen Foundation, Stockholm Resilience Centre and Wellcome  
625 Trust 2019; Accessed July 10, 2020. [https://eatforum.org/content/uploads/2019/01/EAT-](https://eatforum.org/content/uploads/2019/01/EAT-Lancet_Commission_Summary_Report.pdf)  
626 [Lancet Commission Summary Report.pdf](https://eatforum.org/content/uploads/2019/01/EAT-Lancet_Commission_Summary_Report.pdf)
- 627 19. Beulens JWJ, Booth SL, van den Heuvel EGHM, Stoecklin E, Baka A, Vermeer C. **The**  
628 **role of menaquinones (vitamin K2) in human health.** *British Journal of Nutrition*.  
629 2013; **110**: 1357–1368. [https://www.cambridge.org/core/journals/british-journal-of-](https://www.cambridge.org/core/journals/british-journal-of-nutrition/article/the-role-of-menaquinones-vitamin-k2-in-human-health/5B9F317B526629D8BA77B6435F1E5509)  
630 [nutrition/article/the-role-of-menaquinones-vitamin-k2-in-human-](https://www.cambridge.org/core/journals/british-journal-of-nutrition/article/the-role-of-menaquinones-vitamin-k2-in-human-health/5B9F317B526629D8BA77B6435F1E5509)  
631 [health/5B9F317B526629D8BA77B6435F1E5509](https://www.cambridge.org/core/journals/british-journal-of-nutrition/article/the-role-of-menaquinones-vitamin-k2-in-human-health/5B9F317B526629D8BA77B6435F1E5509)
- 632 20. Zile MH. **Vitamin A-not for your eyes only: requirement for heart formation begins**  
633 **early in embryogenesis.** *Nutrients*. 2010; **2** (5): 532-50.  
634 <https://www.ncbi.nlm.nih.gov/pmc/articles/PMC3257662/>
- 635 21. Xing X, Tao F. [Advance of study on vitamin A deficiency and excess associated  
636 with congenital heart disease]. *Wei Sheng Yan Jiu*. 2008; **37** (6): 754-6.  
637 <https://pubmed.ncbi.nlm.nih.gov/19239019/>
- 638 22. Saremi A, Arora R. **Vitamin E and cardiovascular disease.** *Am J Ther*. 2010; **17** (3):  
639 e56-65.
- 640 23. Wang L, Song Y, Manson JE, et al. **Circulating 25-Hydroxy-Vitamin D and Risk of**  
641 **Cardiovascular Disease: A Meta-Analysis of Prospective Studies.** *Circulation:*  
642 *Cardiovascular Quality and Outcomes*. 2012; **5** (6): 819-829.  
643 <http://circoutcomes.ahajournals.org/content/5/6/819.abstract>
- 644 24. Fu X, Harshman SG, Shen X, et al. **Multiple Vitamin K Forms Exist in Dairy Foods.**  
645 *Current developments in nutrition*. 2017; **1** (6): e000638-e000638.  
646 <https://www.ncbi.nlm.nih.gov/pmc/articles/PMC5998353/>
- 647 25. Walther B, Chollet M. Vitamin K2 - Vital for Health and Wellbeing. In: Gordeladze JO,  
648 ed. Menaquinones, Bacteria, and Foods: Vitamin K2 in the Die: IntechOpen, 2017.
- 649 26. Kamao M, Suhara Y, Tsugawa N, et al. **Vitamin K content of foods and dietary**  
650 **vitamin K intake in Japanese young women.** *J Nutr Sci Vitaminol (Tokyo)*. 2007; **53**  
651 (6): 464-70. <https://pubmed.ncbi.nlm.nih.gov/18202532/>
- 652 27. Kaneki M HS, Hosoi T, Fujiwara S, Lyons A, Crean SJ, Ishida N, Nakagawa M, Takechi  
653 M, Sano Y, Mizuno Y, Hoshino S, Miyao M, Inoue S, Horiki K, Shiraki M, Ouchi Y,  
654 Orimo H. **Japanese fermented soybean food as the major determinant of the large**  
655 **geographic difference in circulating levels of vitamin K2: possible implications for**  
656 **hip-fracture risk.** *Nutrition*. 2001; **17** (4): 315-21.  
657 <https://pubmed.ncbi.nlm.nih.gov/11369171/>

- 658 28. Joseph M. Fermented Soy Products: A Guide To 12 Traditional Foods. Nutrition  
659 Advance 2020; Accessed April 11, 2021. [https://www.nutritionadvance.com/fermented-](https://www.nutritionadvance.com/fermented-soy-products/)  
660 [soy-products/](https://www.nutritionadvance.com/fermented-soy-products/)
- 661 29. Tamang JP, Cotter PD, Endo A, et al. **Fermented foods in a global age: East meets**  
662 **West.** *COMPREHENSIVE REVIEWS IN FOOD SCIENCE AND FOOD SAFETY.* 2020;  
663 **19** (1): 184-217. <https://onlinelibrary.wiley.com/doi/full/10.1111/1541-4337.12520>
- 664 30. Pu J, Romanelli R, Zhao B, et al. **Dyslipidemia in special ethnic populations.**  
665 *Cardiology clinics.* 2015; **33** (2): 325-333.  
666 <https://www.ncbi.nlm.nih.gov/pmc/articles/PMC4421090/>
- 667 31. Frank ATH, Zhao B, Jose PO, Azar KMJ, Fortmann SP, Palaniappan LP. **Racial/ethnic**  
668 **differences in dyslipidemia patterns.** *Circulation.* 2014; **129** (5): 570-579.  
669 <https://www.ncbi.nlm.nih.gov/pmc/articles/PMC4212818/>
- 670 32. Keys A, Menotti A, Karvonen MJ, et al. **The diet and 15-year death rate in the seven**  
671 **countries study.** *Am J Epidemiol.* 1986; **124** (6): 903-15.  
672 <https://academic.oup.com/aje/article-abstract/124/6/903/174332?redirectedFrom=fulltext>
- 673 33. Mahmood SS, Levy D, Vasan RS, Wang TJ. **The Framingham Heart Study and the**  
674 **epidemiology of cardiovascular disease: a historical perspective.** *Lancet (London,*  
675 *England).* 2014; **383** (9921): 999-1008.  
676 <https://www.ncbi.nlm.nih.gov/pmc/articles/PMC4159698/>
- 677 34. Dehghan M, Mente A, Zhang X, et al. **Associations of fats and carbohydrate intake**  
678 **with cardiovascular disease and mortality in 18 countries from five continents**  
679 **(PURE): a prospective cohort study.** *The Lancet.* 2017; **390** (10107): 2050-2062.  
680 [https://doi.org/10.1016/S0140-6736\(17\)32252-3](https://doi.org/10.1016/S0140-6736(17)32252-3)
- 681 35. Countries Who Eat The Most Cheese. World Atlas 2021; Accessed March 28, 2021.  
682 [https://www.worldatlas.com/articles/countries-who-consume-the-most-](https://www.worldatlas.com/articles/countries-who-consume-the-most-cheese.html#:~:text=The%20top%20cheese%20consumer%20is,kilograms%20of%20cheese%20per%20capita.)  
683 [cheese.html#:~:text=The%20top%20cheese%20consumer%20is,kilograms%20of%20cheese%20per%20capita.](https://www.worldatlas.com/articles/countries-who-consume-the-most-cheese.html#:~:text=The%20top%20cheese%20consumer%20is,kilograms%20of%20cheese%20per%20capita.)
- 684
- 685 36. Cheese Consumption Per Capita in New Zealand. Czech Republic: Helgi Library,  
686 Source: Faostat Accessed April 9, 2021. [https://www.helgilibrary.com/indicators/cheese-](https://www.helgilibrary.com/indicators/cheese-consumption-per-capita/new-zealand/)  
687 [consumption-per-capita/new-zealand/](https://www.helgilibrary.com/indicators/cheese-consumption-per-capita/new-zealand/)
- 688 37. Khalil Z, Alam B, Akbari AR, Sharma H. **The Medical Benefits of Vitamin K(2) on**  
689 **Calcium-Related Disorders.** *Nutrients.* 2021; **13** (2): 691.  
690 <https://www.ncbi.nlm.nih.gov/pmc/articles/PMC7926526/>
- 691 38. POTATO PROCESSING AND USES. Lima, Peru: International Potato Center  
692 Accessed May 28, 2020. <https://cipotato.org/potato/potato-processing-uses/>
- 693 39. Juul F, Vaidean G, Lin Y, Deierlein Andrea L, Parekh N. **Ultra-Processed Foods and**  
694 **Incident Cardiovascular Disease in the Framingham Offspring Study.** *Journal of the*  
695 *American College of Cardiology.* 2021; **77** (12): 1520-1531.  
696 <https://doi.org/10.1016/j.jacc.2021.01.047>
- 697 40. Srour B, Fezeu LK, Kesse-Guyot E, et al. **Ultra-processed food intake and risk of**  
698 **cardiovascular disease: prospective cohort study (NutriNet-Santé).** *BMJ.* 2019; **365**:  
699 11451. <https://www.bmj.com/content/bmj/365/bmj.11451.full.pdf>
- 700 41. Monteiro CA, Moubarac JC, Cannon G, Ng SW, Popkin B. **Ultra-processed products**  
701 **are becoming dominant in the global food system.** *Obes Rev.* 2013; **14** Suppl 2: 21-8.  
702 <https://pubmed.ncbi.nlm.nih.gov/24102801/>



- 703 42. Mozaffarian D, Fahimi S, Singh GM, et al. **Global Sodium Consumption and Death**  
704 **from Cardiovascular Causes.** *New England Journal of Medicine.* 2014; **371** (7): 624-  
705 634. <https://www.nejm.org/doi/full/10.1056/NEJMoa1304127>
- 706 43. O'Donnell M, Mente A, Yusuf S. **Sodium Intake and Cardiovascular Health.**  
707 *Circulation Research.* 2015; **116** (6): 1046-1057.  
708 <https://www.ahajournals.org/doi/abs/10.1161/CIRCRESAHA.116.303771>
- 709 44. Roseboom T, van der Meulen JHP, Osmond C, et al. **Coronary heart disease after**  
710 **prenatal exposure to the Dutch famine, 1944-45.** *Heart.* 2000; **84** (6): 595-598.  
711 <https://www.heart.bmj.com/content/84/6/595>
- 712 45. Dieterich CM, Felice JP, O'Sullivan E, Rasmussen KM. **Breastfeeding and health**  
713 **outcomes for the mother-infant dyad.** *Pediatric clinics of North America.* 2013; **60** (1):  
714 31-48. <https://www.ncbi.nlm.nih.gov/pmc/articles/PMC3508512/>
- 715 46. Ambient (outdoor) air pollution. Geneva, Switzerland: World Health Organization 2018;  
716 Accessed March 24, 2021. [https://www.who.int/news-room/fact-sheets/detail/ambient-](https://www.who.int/news-room/fact-sheets/detail/ambient-(outdoor)-air-quality-and-health)  
717 [\(outdoor\)-air-quality-and-health](https://www.who.int/news-room/fact-sheets/detail/ambient-(outdoor)-air-quality-and-health)
- 718 47. Tobacco responsible for 20% of deaths from coronary heart disease Geneva,  
719 Switzerland: World Health Organization 2020; Accessed March 2, 2021.  
720 [https://www.who.int/news/item/22-09-2020-tobacco-responsible-for-20-of-deaths-from-](https://www.who.int/news/item/22-09-2020-tobacco-responsible-for-20-of-deaths-from-coronary-heart-disease)  
721 [coronary-heart-disease](https://www.who.int/news/item/22-09-2020-tobacco-responsible-for-20-of-deaths-from-coronary-heart-disease)
- 722 48. Vaziri ND. **Mechanisms of lead-induced hypertension and cardiovascular disease.**  
723 *American Journal of Physiology-Heart and Circulatory Physiology.* 2008; **295** (2):  
724 H454-H465. <https://journals.physiology.org/doi/abs/10.1152/ajpheart.00158.2008>
- 725 49. Lanphear BP, Rauch S, Auinger P, Allen RW, Hornung RW. **Low-level lead exposure**  
726 **and mortality in US adults: a population-based cohort study.** *The Lancet Public*  
727 *Health.* 2018; **3** (4): e177-e184. [https://doi.org/10.1016/S2468-2667\(18\)30025-2](https://doi.org/10.1016/S2468-2667(18)30025-2)
- 728 50. Bikbov B, Purcell CA, Levey AS, et al. **Global, regional, and national burden of**  
729 **chronic kidney disease, 1990-2017: a systematic analysis for the Global Burden of**  
730 **Disease Study 2017.** *The Lancet.* 2020; **395** (10225): 709-733.  
731 [https://doi.org/10.1016/S0140-6736\(20\)30045-3](https://doi.org/10.1016/S0140-6736(20)30045-3)
- 732 51. **Global, regional, and national age-sex-specific mortality for 282 causes of death in**  
733 **195 countries and territories, 1980-2017: a systematic analysis for the Global**  
734 **Burden of Disease Study 2017.** *Lancet.* 2018; **392** (10159): 1736-1788.  
735 [https://www.thelancet.com/journals/lancet/article/PIIS0140-6736\(18\)32203-7/fulltext](https://www.thelancet.com/journals/lancet/article/PIIS0140-6736(18)32203-7/fulltext)
- 736 52. Afshin A, Sur PJ, Fay KA, et al. **Health effects of dietary risks in 195 countries, 1990-**  
737 **2017: a systematic analysis for the Global Burden of Disease Study 2017.** *The Lancet.*  
738 2019; **393** (10184): 1958-1972.  
739 [https://www.thelancet.com/journals/lancet/article/PIIS0140-6736\(19\)30041-8/fulltext](https://www.thelancet.com/journals/lancet/article/PIIS0140-6736(19)30041-8/fulltext)
- 740 53. Stevens GA, Alkema L, Black PRE, et al. **Guidelines for Accurate and Transparent**  
741 **Health Estimates Reporting: the GATHER statement.** *The Lancet.* 2016; **388**  
742 (10062): e19-e23. [https://doi.org/10.1016/S0140-6736\(16\)30388-9](https://doi.org/10.1016/S0140-6736(16)30388-9)  
743

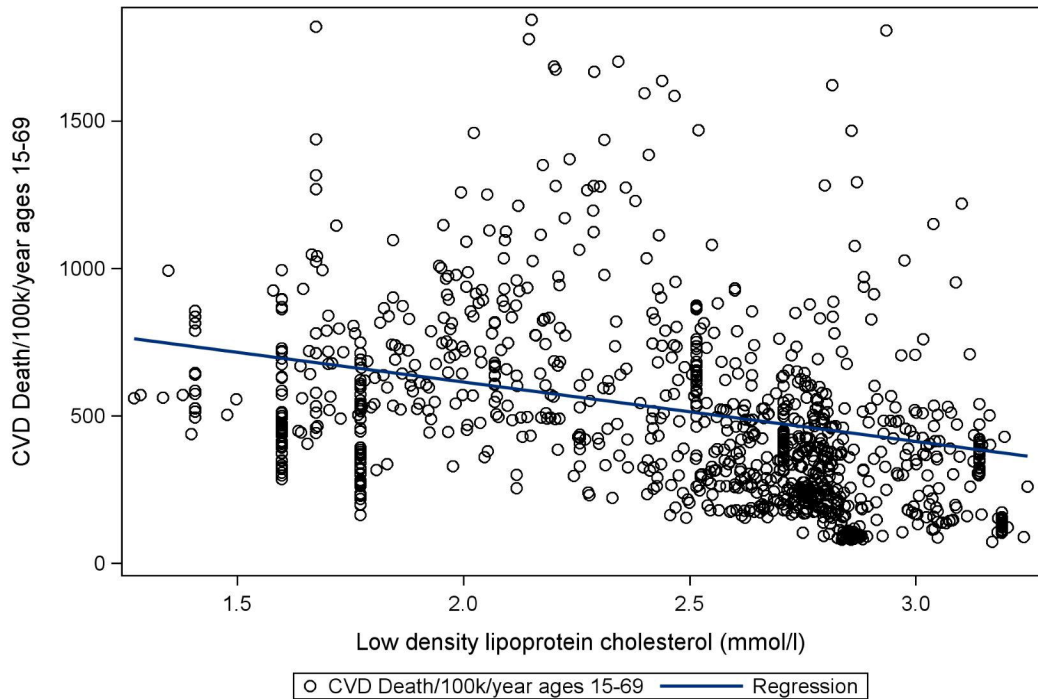

LDL-C,  $r = -0.279$  (95% CI -0.299 to -0.258,  $p < 0.0001$ ,  $n = 7846$  cohorts)

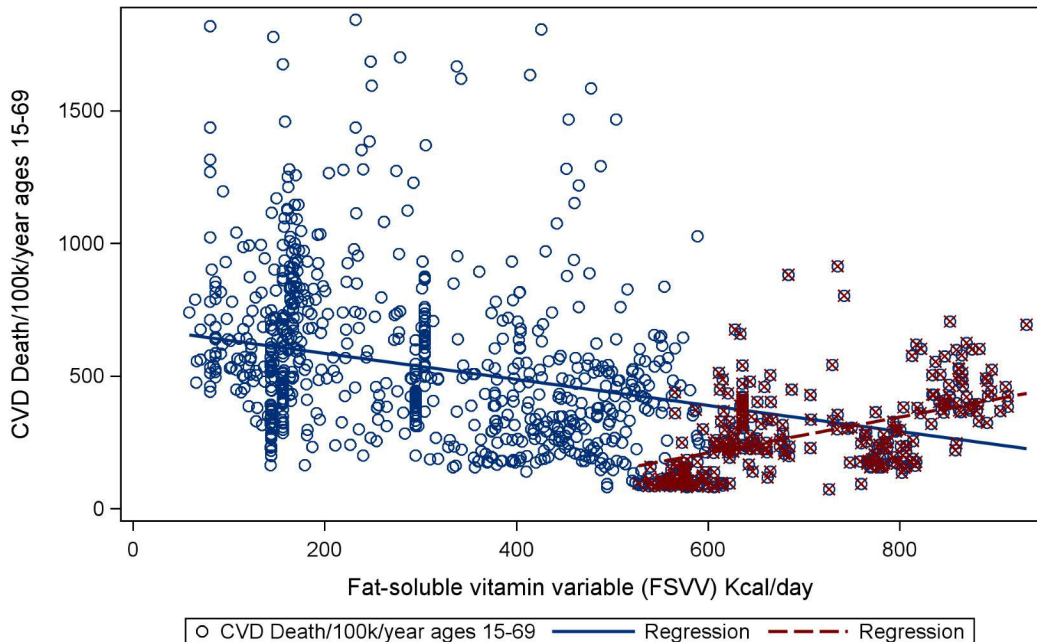

FSVV=Processed meat+Red meat+Fish+Milk+Poultry+Eggs+SFA+PUFA+TFA (all in Kcal/day)

FSVV Worldwide:  $r = -0.329$  (95% CI  $-0.299$  to  $-0.258$ ,  $p < 0.0001$ ,  $n = 7846$  cohorts)

FSVV  $\geq 567.27$  Kcal/day,  $r = 0.523$  (95% CI  $0.476$  to  $0.567$ ,  $p < 0.0001$ ,  $n = 974$  cohorts)
